# Supplementary material for: A pseudopericyclic [3,5]-sigmatropic rearrangement of a coumarin trichloroacetimidate derivative
Source: Royal Society of Chemistry journal article supplement (doi:10.1039/c7ob02335a), 2017-10-27
Supplement: c7ob02335a1.pdf [file c7ob02335a1.pdf]

## Supporting Information

### A pseudopericyclic [3,5]-sigmatropic rearrangement of a coumarin trichloroacetimidate derivative

Trideep Rajale,\*<sup>a,b</sup> Shikha Sharma,<sup>a</sup> Daniel K. Unruh,<sup>a</sup> Daniel A. Stroud<sup>a,c</sup> and David M. Birney\*<sup>a</sup>

<sup>a</sup> *Department of Chemistry and Biochemistry, Texas Tech University, Lubbock, TX 79409-1061, USA*

<sup>b</sup> *Present address: Center for Integrated Nanotechnologies, Los Alamos National Laboratory, Los Alamos, NM 87545, USA*

<sup>c</sup> *Deceased*

| Table of contents                                                                             | Page |
|-----------------------------------------------------------------------------------------------|------|
| 1. Experimental data                                                                          |      |
| a. Experimental procedures                                                                    | S2   |
| b. Copies of <sup>1</sup> H- and <sup>13</sup> C-NMR                                          | S4   |
| c. X-ray crystal structure data for compound <b>8</b>                                         | S7   |
| 2. Computational data                                                                         |      |
| a. Tables S7, S8 of energies of all stationary points optimized at the B3LYP/6-31G(d,p) level | S15  |
| b. Table S9, optimized Cartesian coordinates in .mol2 format                                  | S16  |
| 3. References                                                                                 | S39  |

## Experimental Section

### *General Information*

All the synthesis reactions were performed under nitrogen atmosphere in oven-dried glassware with magnetic stirring unless otherwise specified. Pyrolysis studies were carried out in J Young NMR tubes and thick-walled glass tubes with Teflon seal. Solvents, reagents and starting material were purchased from commercial suppliers and used without further purification. Tetrahydrofuran (THF) was distilled from sodium metal and benzophenone. The progress of reactions was monitored by thin layer chromatography (TLC) with 0.175-0.225 mm pre-coated silica gel plates (60 F<sub>254</sub>) or by <sup>1</sup>H-NMR spectroscopy. TLC plates were visualized under UV light, or by immersion in ethanolic solutions of phosphomolybdic acid or KMnO<sub>4</sub> followed by heating. Flash chromatography was carried out on either silica gel (230-400 mesh) or neutral alumina (activated) using either mixtures of hexane and ethyl acetate or dichloromethane as the eluents. NMR spectra were recorded on a JEOL spectrometer. <sup>1</sup>H-NMR spectra were recorded at 400 MHz and were referenced to the residual solvents (CDCl<sub>3</sub> at 7.26 ppm, C<sub>6</sub>D<sub>6</sub> at 7.16 ppm and toluene-*d*<sub>8</sub> at 2.08 ppm) and reported in part per million (ppm) relative to TMS (0 ppm). <sup>13</sup>C-NMR spectra were recorded at 100 MHz and were referenced to the residual solvents (CDCl<sub>3</sub> at 77.16 ppm). Coupling constants (*J*) are reported in Hertz (Hz) and <sup>1</sup>H-NMR multiplicity data are denoted by s (singlet), bs (broad singlet), d (doublet), t (triplet), dd (doublet of doublets), dt (doublet of triplets) and m (multiplet). High-resolution mass spectra (HRMS) were recorded with an ORBITRAP mass analyzer (Exactive).

### Synthesis scheme for **2** and **3**

Compounds **2** and **3** were prepared in four steps from commercially available 4-hydroxycoumarin following the literature procedure.<sup>1</sup>

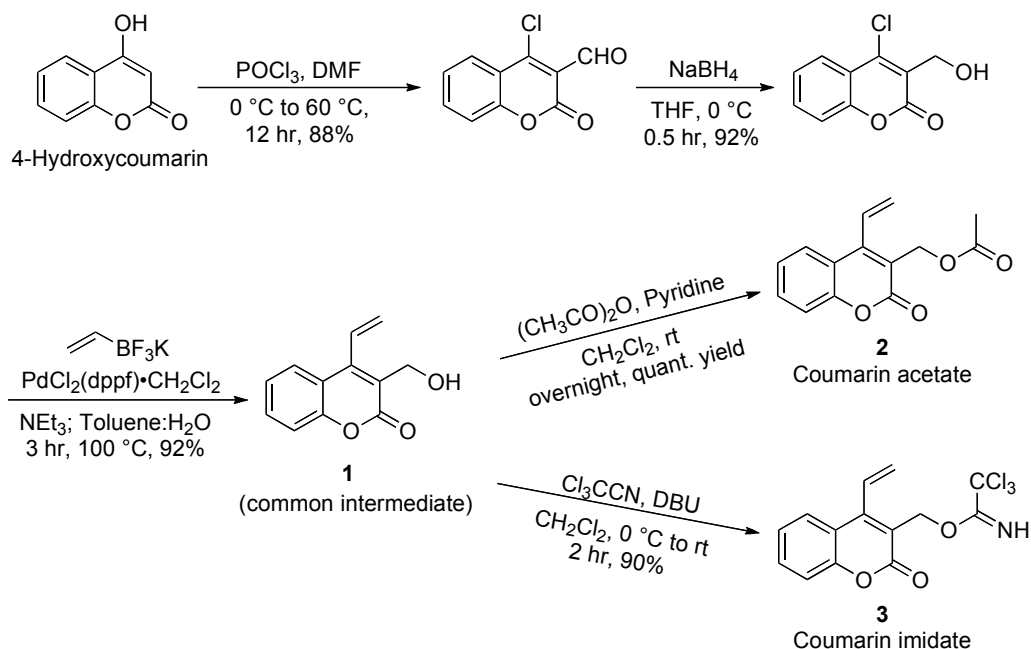

## Thermolysis of coumarin acetate **2** and imidate **3**

### Thermolysis of coumarin acetate **2**

A solution of **2** (10 mg) in 2 mL C<sub>6</sub>D<sub>6</sub> was transferred to a thick-walled glass reaction tube. The solution was purged with argon (UHP: ultra high purity) and sealed with a Teflon cap. The solution was then heated at 250 °C for nearly 10 hours. Upon cooling an aliquot was withdrawn. <sup>1</sup>H-NMR analysis showed signals corresponding to the starting acetate and no new signals were observed.

### Thermolysis of coumarin imidate **3**

A solution of (2-oxo-4-vinyl-2H-chromen-3-yl)methyl-2,2,2-trichloroacetimidate (**3**, 100 mg, 0.29 mmol) in dry toluene (10 mL) was refluxed in an oil bath held at 130 °C in a 25 mL round bottom flask equipped with water condenser under nitrogen atmosphere. The reaction progress was monitored by thin layer chromatography and <sup>1</sup>H-NMR. After refluxing for 16 h TLC and <sup>1</sup>H-NMR confirmed complete conversion. TLC analysis (eluent: 20% ethyl acetate in hexane) showed the absence of imidate and the formation of a more polar spot. The reaction

mixture was concentrated by rotary evaporation. Purification by silica gel column chromatography (eluent: 20-30% ethyl acetate in hexane) yielded **8** as white solid (76 mg, 76% yield).

(*E*)-2,2,2-Trichloro-*N*-(2-(3-methyl-2-oxo-2H-chromen-4-yl)vinyl)acetamide (**8**) mp 178-180 °C; <sup>1</sup>H-NMR (400 MHz, CDCl<sub>3</sub>): δ<sub>H</sub> 8.59 (bs, 1H, NH), 7.65 (dd, *J* = 1.4 Hz, 7.8 Hz, 1H), 7.50 (dt, *J* = 1.4 Hz, 8.0 Hz, 1H), 7.34 (dd, *J* = 1.0 Hz, 8.2 Hz, 1H), 7.30-7.26 (m, 1H), 7.15 (dd, *J* = 10.1 Hz, 14.6 Hz, 1H), 6.50 (d, *J* = 14.6 Hz, 1H), 2.29 (s, 3H). <sup>13</sup>C NMR (100 MHz, CDCl<sub>3</sub>): δ<sub>C</sub> 162.1, 159.5, 152.4, 143.3, 130.9, 129.6, 125.4, 124.3, 122.7, 119.3, 117.2, 109.2, 91.7, 14.9. EI-MS (EI) *m/z*: 345 (M<sup>+</sup>), 228, 200, 184, 156, 145, 128, 115. HRMS (ESI) calculated for C<sub>14</sub>H<sub>10</sub>NCl<sub>3</sub>NaO<sub>3</sub>[M + Na]<sup>+</sup> 367.9624, found 367.9617. Single crystals of **8**, suitable for X-ray crystallography, were obtained by recrystallization from dichloromethane. Structural data has been deposited with CCDC (1568018). Crystallography details can be found below.

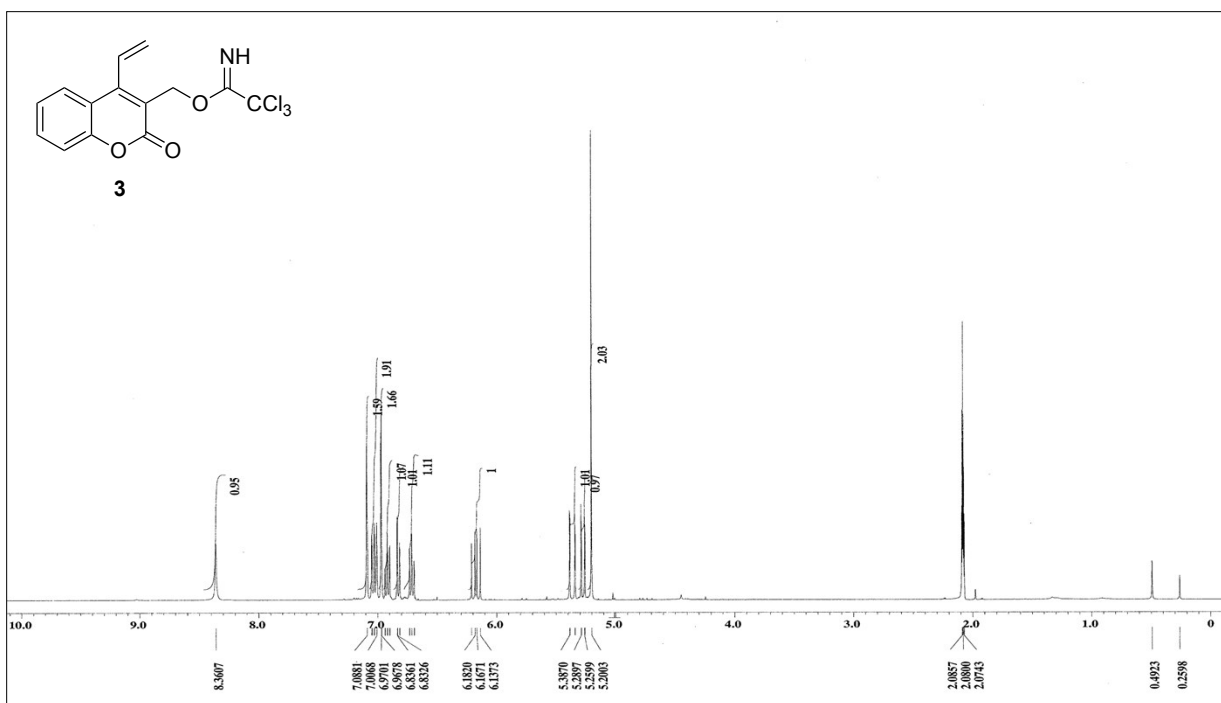

<sup>1</sup>H-NMR of **3** in toluene-*d*<sub>8</sub>

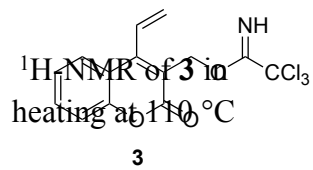

toluene-*d*<sub>8</sub> after  
for 8h

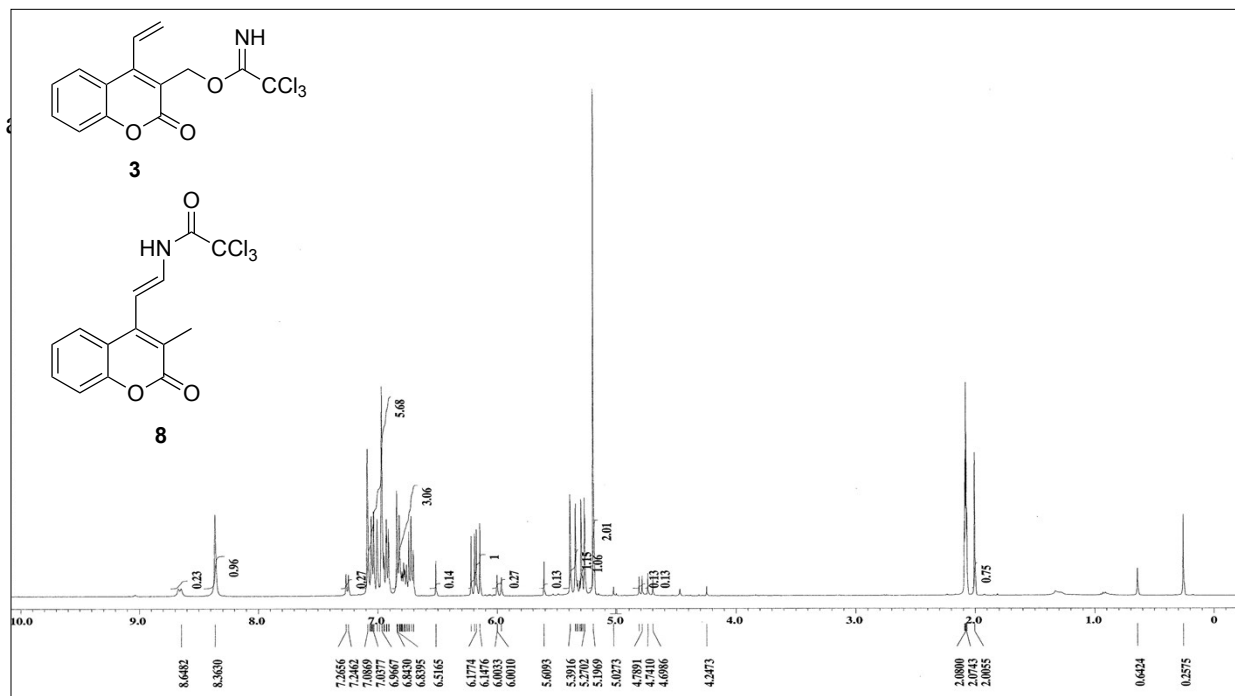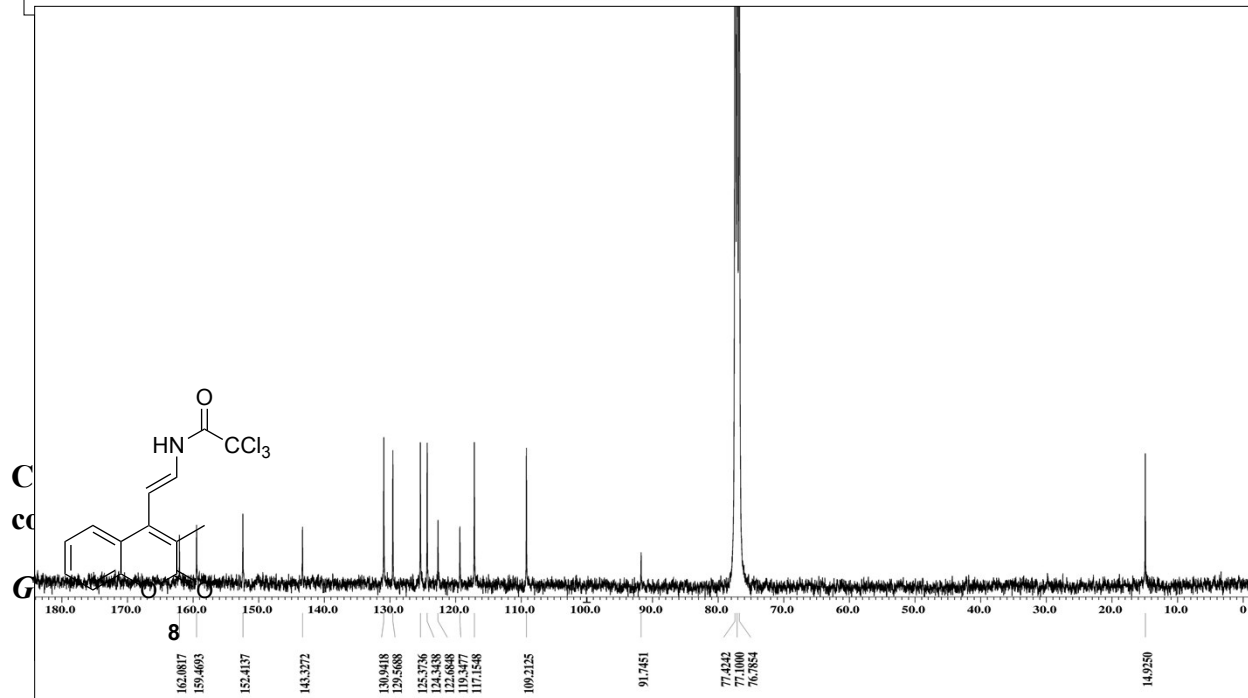

Bruker

PLATFORM

three circle diffractometer equipped with an APEX II CCD detector and operated at 1500 W (50kV, 30 mA) to generate (graphite monochromated) Mo K $\alpha$  radiation ( $\lambda = 0.71073 \text{ \AA}$ ). Crystals were transferred from the vial and placed on a glass slide in polyisobutylene. A Zeiss Stemi 305 microscope was used to identify a suitable specimen for X-ray diffraction from a representative sample of the material. The crystal and a small amount of the oil were collected on a MiTiGen cryoloop and transferred to the instrument where it was placed under a cold nitrogen stream (Oxford) maintained at 100K throughout the duration of the experiment. The sample was optically centered with the aid of a video camera to insure that no translations were observed as the crystal was rotated through all positions.

A unit cell collection was then carried out. After it was determined that the unit cell was not present in the CCDC database a sphere of data was collected. Omega scans were carried out with a 40 sec/frame exposure time and a rotation of  $0.50^\circ$  per frame. After data collection, the crystal was measured for size, morphology, and color. These values are reported in Table 1.

### ***Refinement Details***

After data collection, the unit cell was re-determined using a subset of the full data collection. Intensity data were corrected for Lorentz, polarization, and background effects using the Bruker program APEX 3. A semi-empirical correction for adsorption was applied using the program *SADABS*. The *SHELXL-2014*, series of programs was used for the solution and refinement of the crystal structure. Hydrogen atoms bound to carbon and nitrogen atoms were located in the difference Fourier map and were geometrically constrained using the appropriate AFIX commands. The molecule was crystallized from a solvent mixture containing deuterated chloroform and dichloromethane with both molecules located at the same interstitial site with

partial occupancies of 0.876:0.124, respectively. To help model the small amount of dichloromethane, SADI and EADP restraints were used.

**Table S1.** Crystal data and structure refinement for **8**

---

|                                          |                                                                                                                                            |
|------------------------------------------|--------------------------------------------------------------------------------------------------------------------------------------------|
| Identification code                      | bir16_01                                                                                                                                   |
| Crystal Color                            | colorless                                                                                                                                  |
| Crystal Habit                            | chip                                                                                                                                       |
| Empirical formula                        | C15 H10.25 Cl5.88 D0.88 N O3                                                                                                               |
| Formula weight                           | 462.52                                                                                                                                     |
| Temperature                              | 100(2) K                                                                                                                                   |
| Wavelength                               | 0.71073 Å                                                                                                                                  |
| Crystal system                           | Monoclinic                                                                                                                                 |
| Space group                              | <i>P</i> 2 <sub>1</sub> / <i>c</i>                                                                                                         |
| Unit cell dimensions                     | <i>a</i> = 11.5591(9) Å $\alpha$ = 90 °.<br><i>b</i> = 13.2129(11) Å $\beta$ = 90.8840(10) °.<br><i>c</i> = 12.0726(10) Å $\gamma$ = 90 °. |
| Volume                                   | 1843.6(3) Å <sup>3</sup>                                                                                                                   |
| <i>Z</i>                                 | 4                                                                                                                                          |
| Calculated density                       | 1.666 Mg/m <sup>3</sup>                                                                                                                    |
| Absorption coefficient                   | 0.929 mm <sup>-1</sup>                                                                                                                     |
| <i>F</i> (000)                           | 928                                                                                                                                        |
| Crystal size                             | 0.320 x 0.150 x 0.060 mm                                                                                                                   |
| Theta range for data collection          | 1.762 to 27.942 °.                                                                                                                         |
| Limiting indices                         | -15 ≤ <i>h</i> ≤ 15, -17 ≤ <i>k</i> ≤ 17, -15 ≤ <i>l</i> ≤ 15                                                                              |
| Reflections collected / unique           | 22244 / 4409 [R(int) = 0.0245]                                                                                                             |
| Completeness to theta = 25.242°          | 100.0 %                                                                                                                                    |
| Refinement method                        | Full-matrix least-squares on <i>F</i> <sup>2</sup>                                                                                         |
| Data / restraints / parameters           | 4409 / 3 / 240                                                                                                                             |
| Goodness-of-fit on <i>F</i> <sup>2</sup> | 1.034                                                                                                                                      |
| Final R indices [I > 2σ(I)]              | R1 = 0.0279, wR2 = 0.0699                                                                                                                  |
| Rajale, Sharma, Unruh, Stroud, Birney    | Page S8                      Pseudopericyclic [3,5]-Rearrangement                                                                          |



R indices (all data)

R1 = 0.0334, wR2 = 0.0731

Largest diff. peak and hole

0.471 and -0.383 e.Å<sup>-3</sup>**Table S2.** Atomic coordinates ( $\times 10^4$ ) and equivalent isotropic displacement parameters ( $\text{\AA}^2 \times 10^3$ ) for bir16\_01. U(eq) is defined as one third of the trace of the orthogonalized Uij tensor.

|        | x         | y         | z         | U (eq) |
|--------|-----------|-----------|-----------|--------|
| C1 (1) | 8318 (1)  | -436 (1)  | 5488 (1)  | 22 (1) |
| C1 (2) | 6156 (1)  | -801 (1)  | 4312 (1)  | 27 (1) |
| C1 (3) | 8253 (1)  | -479 (1)  | 3109 (1)  | 32 (1) |
| O (1)  | 5118 (1)  | 5960 (1)  | 6492 (1)  | 15 (1) |
| O (2)  | 3768 (1)  | 5528 (1)  | 7660 (1)  | 19 (1) |
| O (3)  | 7350 (1)  | 1501 (1)  | 3418 (1)  | 20 (1) |
| N (1)  | 6759 (1)  | 1397 (1)  | 5201 (1)  | 13 (1) |
| C (1)  | 4552 (1)  | 5234 (1)  | 7084 (1)  | 14 (1) |
| C (2)  | 4912 (1)  | 4186 (1)  | 6963 (1)  | 15 (1) |
| C (3)  | 5827 (1)  | 3935 (1)  | 6312 (1)  | 13 (1) |
| C (4)  | 6478 (1)  | 4739 (1)  | 5774 (1)  | 14 (1) |
| C (5)  | 7514 (1)  | 4605 (1)  | 5196 (1)  | 18 (1) |
| C (6)  | 8090 (1)  | 5417 (1)  | 4744 (1)  | 23 (1) |
| C (7)  | 7648 (2)  | 6394 (1)  | 4844 (1)  | 23 (1) |
| C (8)  | 6644 (1)  | 6555 (1)  | 5422 (1)  | 19 (1) |
| C (9)  | 6087 (1)  | 5733 (1)  | 5887 (1)  | 14 (1) |
| C (10) | 6158 (1)  | 2864 (1)  | 6211 (1)  | 14 (1) |
| C (11) | 6468 (1)  | 2426 (1)  | 5266 (1)  | 14 (1) |
| C (12) | 7203 (1)  | 1020 (1)  | 4257 (1)  | 13 (1) |
| C (13) | 7490 (1)  | -131 (1)  | 4294 (1)  | 16 (1) |
| C (14) | 4220 (2)  | 3428 (1)  | 7593 (1)  | 22 (1) |
| C1 (4) | 9537 (1)  | 2370 (1)  | 5602 (1)  | 22 (1) |
| C1 (5) | 10508 (1) | 3048 (1)  | 7701 (1)  | 37 (1) |
| C1 (6) | 8833 (1)  | 1432 (1)  | 7655 (1)  | 29 (1) |
| C (15) | 9279 (2)  | 2537 (3)  | 7026 (2)  | 21 (1) |
| D (15) | 8638      | 3040      | 7093      | 25     |
| C (16) | 9080 (19) | 2690 (30) | 6954 (12) | 21 (1) |
| C1 (7) | 10286 (9) | 2703 (10) | 7850 (9)  | 87 (4) |

**Table S3.** Bond lengths [ $\text{\AA}$ ] and angles [ $^\circ$ ] for bir16\_01.

|               |             |
|---------------|-------------|
| C1 (1)-C (13) | 1.7640 (15) |
| C1 (2)-C (13) | 1.7778 (16) |
| C1 (3)-C (13) | 1.7541 (15) |
| O (1)-C (1)   | 1.3685 (17) |
| O (1)-C (9)   | 1.3801 (17) |
| O (2)-C (1)   | 1.2141 (18) |
| O (3)-C (12)  | 1.2105 (17) |
| N (1)-C (12)  | 1.3517 (18) |
| N (1)-C (11)  | 1.4035 (17) |
| N (1)-H (1)   | 0.8800      |
| C (1)-C (2)   | 1.454 (2)   |

|                 |             |
|-----------------|-------------|
| C (2) -C (3)    | 1.367 (2)   |
| C (2) -C (14)   | 1.498 (2)   |
| C (3) -C (4)    | 1.4600 (19) |
| C (3) -C (10)   | 1.4721 (19) |
| C (4) -C (9)    | 1.3959 (19) |
| C (4) -C (5)    | 1.406 (2)   |
| C (5) -C (6)    | 1.379 (2)   |
| C (5) -H (5)    | 0.9500      |
| C (6) -C (7)    | 1.395 (2)   |
| C (6) -H (6)    | 0.9500      |
| C (7) -C (8)    | 1.381 (2)   |
| C (7) -H (7)    | 0.9500      |
| C (8) -C (9)    | 1.386 (2)   |
| C (8) -H (8)    | 0.9500      |
| C (10) -C (11)  | 1.333 (2)   |
| C (10) -H (10)  | 0.9500      |
| C (11) -H (11)  | 0.9500      |
| C (12) -C (13)  | 1.557 (2)   |
| C (14) -H (14A) | 0.9800      |
| C (14) -H (14B) | 0.9800      |
| C (14) -H (14C) | 0.9800      |
| C1 (4) -C (15)  | 1.763 (2)   |
| C1 (4) -C (16)  | 1.776 (15)  |
| C1 (5) -C (15)  | 1.763 (3)   |
| C1 (6) -C (15)  | 1.727 (4)   |
| C (15) -D (15)  | 1.0000      |
| C (16) -C1 (7)  | 1.751 (16)  |
| C (16) -H (16A) | 0.9900      |
| C (16) -H (16B) | 0.9900      |

|                       |             |
|-----------------------|-------------|
| C (1) -O (1) -C (9)   | 121.44 (11) |
| C (12) -N (1) -C (11) | 119.95 (12) |
| C (12) -N (1) -H (1)  | 120.0       |
| C (11) -N (1) -H (1)  | 120.0       |
| O (2) -C (1) -O (1)   | 116.22 (13) |
| O (2) -C (1) -C (2)   | 125.37 (13) |
| O (1) -C (1) -C (2)   | 118.40 (12) |
| C (3) -C (2) -C (1)   | 120.89 (13) |
| C (3) -C (2) -C (14)  | 123.65 (13) |
| C (1) -C (2) -C (14)  | 115.46 (12) |
| C (2) -C (3) -C (4)   | 119.21 (13) |
| C (2) -C (3) -C (10)  | 119.01 (13) |
| C (4) -C (3) -C (10)  | 121.73 (13) |
| C (9) -C (4) -C (5)   | 116.52 (13) |
| C (9) -C (4) -C (3)   | 118.06 (13) |
| C (5) -C (4) -C (3)   | 125.33 (13) |
| C (6) -C (5) -C (4)   | 121.23 (14) |
| C (6) -C (5) -H (5)   | 119.4       |
| C (4) -C (5) -H (5)   | 119.4       |
| C (5) -C (6) -C (7)   | 120.43 (15) |
| C (5) -C (6) -H (6)   | 119.8       |
| C (7) -C (6) -H (6)   | 119.8       |
| C (8) -C (7) -C (6)   | 119.83 (14) |
| C (8) -C (7) -H (7)   | 120.1       |

|                          |             |
|--------------------------|-------------|
| C (6) -C (7) -H (7)      | 120.1       |
| C (7) -C (8) -C (9)      | 118.96 (14) |
| C (7) -C (8) -H (8)      | 120.5       |
| C (9) -C (8) -H (8)      | 120.5       |
| O (1) -C (9) -C (8)      | 115.42 (12) |
| O (1) -C (9) -C (4)      | 121.59 (13) |
| C (8) -C (9) -C (4)      | 122.98 (14) |
| C (11) -C (10) -C (3)    | 124.18 (13) |
| C (11) -C (10) -H (10)   | 117.9       |
| C (3) -C (10) -H (10)    | 117.9       |
| C (10) -C (11) -N (1)    | 122.43 (13) |
| C (10) -C (11) -H (11)   | 118.8       |
| N (1) -C (11) -H (11)    | 118.8       |
| O (3) -C (12) -N (1)     | 124.89 (13) |
| O (3) -C (12) -C (13)    | 120.28 (13) |
| N (1) -C (12) -C (13)    | 114.80 (12) |
| C (12) -C (13) -Cl (3)   | 110.02 (10) |
| C (12) -C (13) -Cl (1)   | 111.02 (10) |
| Cl (3) -C (13) -Cl (1)   | 109.47 (8)  |
| C (12) -C (13) -Cl (2)   | 107.60 (10) |
| Cl (3) -C (13) -Cl (2)   | 109.05 (8)  |
| Cl (1) -C (13) -Cl (2)   | 109.63 (8)  |
| C (2) -C (14) -H (14A)   | 109.5       |
| C (2) -C (14) -H (14B)   | 109.5       |
| H (14A) -C (14) -H (14B) | 109.5       |
| C (2) -C (14) -H (14C)   | 109.5       |
| H (14A) -C (14) -H (14C) | 109.5       |
| H (14B) -C (14) -H (14C) | 109.5       |
| Cl (6) -C (15) -Cl (5)   | 111.35 (13) |
| Cl (6) -C (15) -Cl (4)   | 112.27 (18) |
| Cl (5) -C (15) -Cl (4)   | 110.58 (18) |
| Cl (6) -C (15) -D (15)   | 107.5       |
| Cl (5) -C (15) -D (15)   | 107.5       |
| Cl (4) -C (15) -D (15)   | 107.5       |
| Cl (7) -C (16) -Cl (4)   | 109.0 (12)  |
| Cl (7) -C (16) -H (16A)  | 109.9       |
| Cl (4) -C (16) -H (16A)  | 109.9       |
| Cl (7) -C (16) -H (16B)  | 109.9       |
| Cl (4) -C (16) -H (16B)  | 109.9       |
| H (16A) -C (16) -H (16B) | 108.3       |

---

Symmetry transformations used to generate equivalent atoms:

**Table S4.** Anisotropic displacement parameters ( $\text{\AA}^2 \times 10^3$ ) for bir16\_01. The anisotropic displacement factor exponent takes the form:  $-2 \pi^2 [ h^2 a^{*2} U^{11} + \dots + 2 h k a^* b^* U^{12} ]$

|        | U11    | U22      | U33    | U23     | U13     | U12     |
|--------|--------|----------|--------|---------|---------|---------|
| C1 (1) | 26 (1) | 22 (1)   | 17 (1) | -1 (1)  | -4 (1)  | 10 (1)  |
| C1 (2) | 28 (1) | 13 (1)   | 39 (1) | 2 (1)   | -8 (1)  | -4 (1)  |
| C1 (3) | 49 (1) | 31 (1)   | 17 (1) | -2 (1)  | 10 (1)  | 21 (1)  |
| O (1)  | 19 (1) | 11 (1)   | 17 (1) | -1 (1)  | 4 (1)   | 1 (1)   |
| O (2)  | 21 (1) | 17 (1)   | 18 (1) | -3 (1)  | 6 (1)   | 2 (1)   |
| O (3)  | 28 (1) | 17 (1)   | 14 (1) | 2 (1)   | 6 (1)   | 1 (1)   |
| N (1)  | 17 (1) | 9 (1)    | 12 (1) | 1 (1)   | 3 (1)   | 0 (1)   |
| C (1)  | 18 (1) | 13 (1)   | 12 (1) | -1 (1)  | 0 (1)   | 0 (1)   |
| C (2)  | 19 (1) | 13 (1)   | 13 (1) | 0 (1)   | 2 (1)   | 0 (1)   |
| C (3)  | 17 (1) | 11 (1)   | 11 (1) | -1 (1)  | -1 (1)  | 0 (1)   |
| C (4)  | 17 (1) | 12 (1)   | 12 (1) | -1 (1)  | 0 (1)   | 0 (1)   |
| C (5)  | 19 (1) | 14 (1)   | 21 (1) | -4 (1)  | 3 (1)   | 1 (1)   |
| C (6)  | 21 (1) | 20 (1)   | 28 (1) | -3 (1)  | 10 (1)  | -3 (1)  |
| C (7)  | 27 (1) | 16 (1)   | 27 (1) | 0 (1)   | 8 (1)   | -7 (1)  |
| C (8)  | 26 (1) | 11 (1)   | 21 (1) | -1 (1)  | 3 (1)   | -1 (1)  |
| C (9)  | 16 (1) | 14 (1)   | 12 (1) | -2 (1)  | 0 (1)   | 1 (1)   |
| C (10) | 17 (1) | 10 (1)   | 16 (1) | 1 (1)   | 2 (1)   | 0 (1)   |
| C (11) | 15 (1) | 9 (1)    | 16 (1) | 1 (1)   | 1 (1)   | 1 (1)   |
| C (12) | 12 (1) | 12 (1)   | 15 (1) | -1 (1)  | 0 (1)   | 1 (1)   |
| C (13) | 19 (1) | 15 (1)   | 14 (1) | -1 (1)  | 0 (1)   | 5 (1)   |
| C (14) | 29 (1) | 16 (1)   | 22 (1) | 2 (1)   | 12 (1)  | 0 (1)   |
| C1 (4) | 19 (1) | 30 (1)   | 19 (1) | -3 (1)  | 3 (1)   | 1 (1)   |
| C1 (5) | 35 (1) | 48 (1)   | 29 (1) | -16 (1) | 2 (1)   | -19 (1) |
| C1 (6) | 36 (1) | 26 (1)   | 24 (1) | -1 (1)  | 10 (1)  | -9 (1)  |
| C (15) | 17 (1) | 27 (2)   | 20 (1) | -3 (1)  | 4 (1)   | 3 (1)   |
| C (16) | 17 (1) | 27 (2)   | 20 (1) | -3 (1)  | 4 (1)   | 3 (1)   |
| C1 (7) | 59 (6) | 141 (10) | 58 (5) | -62 (6) | -32 (4) | 62 (6)  |

**Table S5.** Hydrogen coordinates ( $\times 10^4$ ) and isotropic displacement parameters ( $\text{\AA}^2 \times 10^3$ ) for bir16\_01.

|         | x    | y    | z    | U (eq) |
|---------|------|------|------|--------|
| H (1)   | 6653 | 998  | 5773 | 15     |
| H (5)   | 7823 | 3943 | 5116 | 21     |
| H (6)   | 8791 | 5309 | 4361 | 27     |
| H (7)   | 8038 | 6949 | 4515 | 28     |
| H (8)   | 6339 | 7218 | 5500 | 23     |
| H (10)  | 6150 | 2458 | 6861 | 17     |
| H (11)  | 6494 | 2826 | 4613 | 16     |
| H (14A) | 4148 | 2803 | 7160 | 34     |
| H (14B) | 3447 | 3703 | 7731 | 34     |
| H (14C) | 4609 | 3281 | 8302 | 34     |
| H (16A) | 8709 | 3367 | 6944 | 25     |

H (16B)            8507            2192            7213            25

---

**Table S6.** Hydrogen bonds for bir16\_01 [ $\text{\AA}$  and  $^\circ$ ].

| D-H          | d (D-H) | d (H...A) | <DHA   | d (D...A) | A                        |
|--------------|---------|-----------|--------|-----------|--------------------------|
| N1-H1        | 0.880   | 2.057     | 160.36 | 2.900     | O2 [-x+1, y-1/2, -z+3/2] |
| C10-H10      | 0.950   | 2.617     | 137.02 | 3.375     | O2 [-x+1, y-1/2, -z+3/2] |
| C15_a-D15_a  | 1.000   | 2.283     | 136.52 | 3.087     | O3 [x, -y+1/2, z+1/2]    |
| C16_b-H16A_b | 0.990   | 2.398     | 110.20 | 2.893     | O3 [x, -y+1/2, z+1/2]    |

## Computational data

All calculations were performed with Gaussian09.<sup>2</sup>

**Table S7.** Energies and low or imaginary frequencies of the stationary points for the reactions of acetate **2** at B3LYP/6-31G(d,p) level of theory

| Structure | Frequency | B3LYP energy <sup>a</sup> | ZPVE <sup>b</sup> | B3LYP energy <sup>b,c</sup> | Gibbs Free Energy | Relative Gibbs Free Energy <sup>b,e</sup> |
|-----------|-----------|---------------------------|-------------------|-----------------------------|-------------------|-------------------------------------------|
| str-2     | 26.3      | -841.6290                 | 145.3             | 0.0                         | -841.44282        | 0.0                                       |
| str-4     | 23.4      | -841.5977                 | 144.1             | 18.4                        | -841.41226        | 19.2                                      |
| str-5     | 24.3      | -841.6168                 | 145               | 7.4                         | -841.43120        | 7.3                                       |
| str-9     | 27.2      | -841.6378                 | 144.8             | -6.0                        | -841.45250        | -6.1                                      |
| [3,3]-TS1 | 428.8i    | -841.5622                 | 143.4             | 40.0                        | -841.37715        | 41.2                                      |
| [3,5]-TS2 | 508.0i    | -841.5686                 | 144.8             | 37.4                        | -841.38145        | 38.5                                      |
| [3,3]-TS3 | 302.0i    | -841.5500                 | 142.9             | 47.2                        | -841.36608        | 48.2                                      |
| [1,5]-TS4 | 1427.2i   | -841.5787                 | 142.3             | 21.2 <sup>d</sup>           | -841.39581        | 22.2 <sup>d</sup>                         |

<sup>a</sup> Energies in atomic units (au); <sup>b</sup> Energies in kcal/mol; <sup>c</sup>Relative (B3LYP + ZPVE) energy;

<sup>d</sup> Relative to str-5; <sup>e</sup> Relative Gibbs Free Energies (B3LYP)

**Table S8.** Energies and low or imaginary frequencies of the stationary points for the reactions of coumarin trichloroacetimidate **3** at B3LYP/6-31G(d,p) level of theory

| Structure | Frequency | B3LYP energy <sup>a</sup> | ZPVE <sup>b</sup> | Relative energy <sup>y,b,c</sup> | Gibbs Free Energy | Relative Gibbs Free Energy <sup>b,e</sup> |
|-----------|-----------|---------------------------|-------------------|----------------------------------|-------------------|-------------------------------------------|
| str-3     | 15.8      | -2200.4885                | 135.2             | 0.0                              | -2200.32364       | 0.0                                       |
| str-6     | 14.7      | -2200.4825                | 134.2             | 2.8                              | -2200.31883       | 3.0                                       |
| str-7     | 10.9      | -2200.5045                | 135.2             | -10.1                            | -2200.34130       | -11.1                                     |
| str-8     | 8.8       | -2200.5288                | 135.1             | -25.4                            | -2200.36539       | -26.2                                     |
| str-10    | 9.8       | -2200.5220                | 135.7             | -20.6                            | -2200.35653       | -20.6                                     |
| [3,3]-TS5 | 450.3i    | -2200.4345                | 133.4             | 32.0                             | -2200.27141       | 32.8                                      |
| [3,5]-TS6 | 416.4i    | -2200.4413                | 135.2             | 29.6                             | -2200.27432       | 31.0                                      |
| [1,3]-TS7 | 328.1i    | -2200.4191                | 132.6             | 40.9                             | -2200.25840       | 40.9                                      |
| [1,5]-TS8 | 1404.6i   | -2200.4678                | 132.5             | 20.3 <sup>d</sup>                | -2200.30670       | 21.7 <sup>d</sup>                         |

<sup>a</sup> Energies in atomic units (au); <sup>b</sup> Energies in kcal/mol; <sup>c</sup>Relative (B3LYP + ZPVE) energy; <sup>d</sup>Relative to str-7; <sup>e</sup> Relative Gibbs Free Energies (B3LYP)

**Table S9.** Optimized Cartesian coordinates in .mol2 format of all the B3LYP/6-31G(d,p) optimized structures.

str-2 optimized structure: minimum

```
@<TRIPOS>MOLECULE
Molecule Name
30 31
SMALL
NO_CHARGES
```

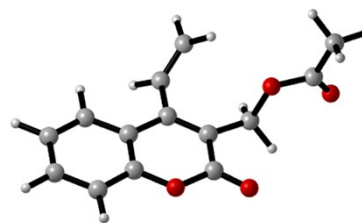

2

```
@<TRIPOS>ATOM
1 C1 -0.1898 2.2109 -0.5554 C
2 H2 -0.8730 2.7903 -1.1740 H
3 O3 4.4643 -0.1386 -0.8388 O
4 C4 3.9144 -0.0436 0.2352 C
5 C5 4.6028 -0.0236 1.5791 C
```

|        |         |         |           |
|--------|---------|---------|-----------|
| 6 H6   | 4.3610  | -0.9403 | 2.1259 H  |
| 7 H7   | 5.6804  | 0.0405  | 1.4322 H  |
| 8 H8   | 4.2514  | 0.8187  | 2.1808 H  |
| 9 O9   | 2.5681  | 0.0483  | 0.3827 O  |
| 10 C10 | -0.5492 | 0.7894  | -0.3690 C |
| 11 C11 | 0.3559  | -0.2321 | -0.4905 C |
| 12 C12 | -1.9450 | 0.4709  | -0.0783 C |
| 13 C13 | -0.0475 | -1.6333 | -0.2994 C |
| 14 C14 | -2.9562 | 1.4381  | 0.0951 C  |
| 15 C15 | -2.3070 | -0.8807 | 0.0637 C  |
| 16 C16 | -4.2647 | 1.0655  | 0.3676 C  |
| 17 H17 | -5.0277 | 1.8262  | 0.4959 H  |
| 18 C18 | -3.6205 | -1.2673 | 0.3381 C  |
| 19 C19 | -4.5977 | -0.2912 | 0.4843 C  |
| 20 H20 | -5.6210 | -0.5843 | 0.6975 H  |
| 21 H21 | -2.7022 | 2.4899  | 0.0289 H  |
| 22 H22 | -3.8430 | -2.3242 | 0.4339 H  |
| 23 O23 | -1.3882 | -1.8812 | -0.0503 O |
| 24 O24 | 0.6940  | -2.5871 | -0.3629 O |
| 25 C25 | 0.8604  | 2.8263  | -0.0020 C |
| 26 H26 | 1.5496  | 2.3038  | 0.6531 H  |
| 27 H27 | 1.0459  | 3.8803  | -0.1842 H |
| 28 C28 | 1.8022  | -0.0555 | -0.8500 C |
| 29 H29 | 1.9632  | 0.8466  | -1.4424 H |
| 30 H30 | 2.1623  | -0.9220 | -1.4044 H |

@<TRIPOS>BOND

1 1 2 1  
2 1 10 1  
3 1 25 2  
4 3 4 2  
5 4 5 1  
6 4 9 1  
7 5 6 1  
8 5 7 1  
9 5 8 1  
10 9 28 1  
11 10 11 2  
12 10 12 1  
13 11 13 1  
14 11 28 1  
15 12 14 Ar  
16 12 15 Ar  
17 13 23 1  
18 13 24 2  
19 14 16 Ar  
20 14 21 1  
21 15 18 Ar  
22 15 23 1  
23 16 17 1  
24 16 19 Ar  
25 18 19 Ar  
26 18 22 1  
27 19 20 1  
28 25 26 1



29 25 27 1  
30 28 29 1  
31 28 30 1

str-4 optimized structure: minimum

@<TRIPOS>MOLECULE

Molecule Name

30 31

SMALL

NO\_CHARGES

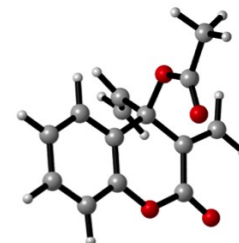

4

@<TRIPOS>ATOM

|    |     |         |         |         |   |
|----|-----|---------|---------|---------|---|
| 1  | C1  | 0.7512  | 0.0761  | -2.2189 | C |
| 2  | H2  | 0.3851  | 0.9664  | -2.7249 | H |
| 3  | O3  | 1.2435  | 1.4229  | -0.3676 | O |
| 4  | C4  | 1.2438  | 1.8017  | 0.9410  | C |
| 5  | C5  | 1.9136  | 3.1456  | 1.0987  | C |
| 6  | H6  | 1.9367  | 3.4141  | 2.1542  | H |
| 7  | H7  | 2.9305  | 3.1094  | 0.6978  | H |
| 8  | H8  | 1.3660  | 3.9053  | 0.5331  | H |
| 9  | O9  | 0.7730  | 1.1410  | 1.8373  | O |
| 10 | C10 | 0.5978  | 0.1436  | -0.7052 | C |
| 11 | C11 | 1.2977  | -1.0021 | 0.0114  | C |
| 12 | C12 | -0.8848 | 0.2145  | -0.3754 | C |
| 13 | C13 | 0.5280  | -2.0388 | 0.7619  | C |
| 14 | C14 | -1.6732 | 1.2874  | -0.8118 | C |
| 15 | C15 | -1.5073 | -0.8074 | 0.3410  | C |
| 16 | C16 | -3.0393 | 1.3323  | -0.5499 | C |
| 17 | H17 | -3.6294 | 2.1757  | -0.8939 | H |
| 18 | C18 | -2.8775 | -0.7826 | 0.6043  | C |
| 19 | C19 | -3.6433 | 0.2883  | 0.1561  | C |
| 20 | H20 | -4.7085 | 0.3111  | 0.3639  | H |
| 21 | H21 | -1.1997 | 2.1036  | -1.3487 | H |
| 22 | H22 | -3.3114 | -1.6016 | 1.1673  | H |
| 23 | O23 | -0.8309 | -1.9037 | 0.8372  | O |
| 24 | O24 | 1.0302  | -3.0021 | 1.2885  | O |
| 25 | C25 | 1.2184  | -0.9440 | -2.9350 | C |
| 26 | H26 | 1.5851  | -1.8585 | -2.4821 | H |
| 27 | H27 | 1.2405  | -0.8889 | -4.0188 | H |
| 28 | C28 | 2.6287  | -1.1345 | -0.0150 | C |
| 29 | H29 | 3.2560  | -0.4212 | -0.5381 | H |
| 30 | H30 | 3.1004  | -1.9585 | 0.5078  | H |

@<TRIPOS>BOND

1 1 2 1  
2 1 10 1  
3 1 25 2  
4 3 4 1  
5 3 10 1  
6 4 5 1  
7 4 9 2  
8 5 6 1  
9 5 7 1  
10 5 8 1

```

11 10 11 1
12 10 12 1
13 11 13 1
14 11 28 2
15 12 14 Ar
16 12 15 Ar
17 13 23 1
18 13 24 2
19 14 16 Ar
20 14 21 1
21 15 18 Ar
22 15 23 1
23 16 17 1
24 16 19 Ar
25 18 19 Ar
26 18 22 1
27 19 20 1
28 25 26 1
29 25 27 1
30 28 29 1
31 28 30 1

```

**str-5 optimized structure: minimum**

@<TRIPOS>MOLECULE

Molecule Name

30 31

SMALL

NO\_CHARGES

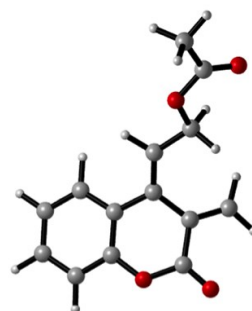

5

@<TRIPOS>ATOM

|    |     |         |         |         |   |
|----|-----|---------|---------|---------|---|
| 1  | C1  | -0.8802 | 0.5370  | 0.3732  | C |
| 2  | H2  | -0.9157 | 1.6190  | 0.2763  | H |
| 3  | O3  | -3.1191 | 0.6884  | -0.3587 | O |
| 4  | C4  | -4.4396 | 0.4168  | -0.2080 | C |
| 5  | C5  | -5.2732 | 1.2974  | -1.1065 | C |
| 6  | H6  | -5.0316 | 1.0934  | -2.1540 | H |
| 7  | H7  | -6.3294 | 1.1010  | -0.9264 | H |
| 8  | H8  | -5.0481 | 2.3509  | -0.9191 | H |
| 9  | O9  | -4.8649 | -0.4271 | 0.5492  | O |
| 10 | C10 | 0.3283  | -0.0679 | 0.3742  | C |
| 11 | C11 | 0.5235  | -1.5319 | 0.4350  | C |
| 12 | C12 | 1.5828  | 0.7005  | 0.2340  | C |
| 13 | C13 | 1.6535  | -2.1185 | -0.3592 | C |
| 14 | C14 | 1.7363  | 2.0418  | 0.6208  | C |
| 15 | C15 | 2.6974  | 0.0569  | -0.3222 | C |
| 16 | C16 | 2.9392  | 2.7144  | 0.4315  | C |
| 17 | H17 | 3.0332  | 3.7498  | 0.7431  | H |
| 18 | C18 | 3.9084  | 0.7168  | -0.5209 | C |
| 19 | C19 | 4.0268  | 2.0517  | -0.1454 | C |
| 20 | H20 | 4.9690  | 2.5701  | -0.2930 | H |
| 21 | H21 | 0.9043  | 2.5519  | 1.0957  | H |
| 22 | H22 | 4.7330  | 0.1703  | -0.9651 | H |

|    |     |         |         |         |   |
|----|-----|---------|---------|---------|---|
| 23 | O23 | 2.6544  | -1.2624 | -0.7413 | O |
| 24 | O24 | 1.7422  | -3.2797 | -0.6718 | O |
| 25 | C25 | -2.2225 | -0.1107 | 0.4468  | C |
| 26 | H26 | -2.2120 | -1.1400 | 0.0713  | H |
| 27 | H27 | -2.6197 | -0.1480 | 1.4692  | H |
| 28 | C28 | -0.2118 | -2.3957 | 1.1559  | C |
| 29 | H29 | 0.0003  | -3.4577 | 1.1031  | H |
| 30 | H30 | -0.9979 | -2.0670 | 1.8252  | H |

@<TRIPOS>BOND

|    |    |    |    |
|----|----|----|----|
| 1  | 1  | 2  | 1  |
| 2  | 1  | 10 | 2  |
| 3  | 1  | 25 | 1  |
| 4  | 3  | 4  | 1  |
| 5  | 3  | 25 | 1  |
| 6  | 4  | 5  | 1  |
| 7  | 4  | 9  | 2  |
| 8  | 5  | 6  | 1  |
| 9  | 5  | 7  | 1  |
| 10 | 5  | 8  | 1  |
| 11 | 10 | 11 | 1  |
| 12 | 10 | 12 | 1  |
| 13 | 11 | 13 | 1  |
| 14 | 11 | 28 | 2  |
| 15 | 12 | 14 | Ar |
| 16 | 12 | 15 | Ar |
| 17 | 13 | 23 | 1  |
| 18 | 13 | 24 | 2  |
| 19 | 14 | 16 | Ar |
| 20 | 14 | 21 | 1  |
| 21 | 15 | 18 | Ar |
| 22 | 15 | 23 | 1  |
| 23 | 16 | 17 | 1  |
| 24 | 16 | 19 | Ar |
| 25 | 18 | 19 | Ar |
| 26 | 18 | 22 | 1  |
| 27 | 19 | 20 | 1  |
| 28 | 25 | 26 | 1  |
| 29 | 25 | 27 | 1  |
| 30 | 28 | 29 | 1  |
| 31 | 28 | 30 | 1  |

str-9 optimized structure: minimum

@<TRIPOS>MOLECULE

Molecule Name

30 31

SMALL

NO\_CHARGES

@<TRIPOS>ATOM

|   |    |        |         |         |   |
|---|----|--------|---------|---------|---|
| 1 | C1 | 0.9468 | -0.4164 | -0.5705 | C |
| 2 | H2 | 0.9716 | -1.2519 | -1.2656 | H |

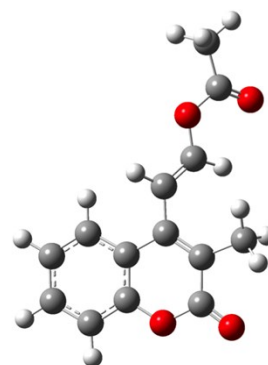

|    |     |         |         |         |   |
|----|-----|---------|---------|---------|---|
| 3  | C3  | 4.4255  | -0.3219 | 0.2857  | C |
| 4  | O4  | 4.4782  | 0.5694  | 1.0955  | O |
| 5  | C5  | -0.3650 | 0.1929  | -0.2915 | C |
| 6  | C6  | -0.5739 | 1.5469  | -0.2316 | C |
| 7  | C7  | -1.4994 | -0.7152 | -0.1130 | C |
| 8  | C8  | -1.9168 | 2.0858  | 0.0382  | C |
| 9  | C9  | -1.3973 | -2.1211 | -0.1233 | C |
| 10 | C10 | -2.7738 | -0.1626 | 0.1011  | C |
| 11 | C11 | -2.5173 | -2.9246 | 0.0415  | C |
| 12 | H12 | -2.4130 | -4.0048 | 0.0283  | H |
| 13 | C13 | -3.9079 | -0.9598 | 0.2684  | C |
| 14 | C14 | -3.7772 | -2.3422 | 0.2327  | C |
| 15 | H15 | -4.6543 | -2.9686 | 0.3621  | H |
| 16 | H16 | -0.4242 | -2.5826 | -0.2469 | H |
| 17 | H17 | -4.8651 | -0.4755 | 0.4269  | H |
| 18 | O18 | -2.9616 | 1.1863  | 0.1679  | O |
| 19 | O19 | -2.1816 | 3.2636  | 0.1371  | O |
| 20 | C20 | 2.0978  | -0.0517 | 0.0032  | C |
| 21 | H21 | 1.3124  | 2.2322  | -1.0308 | H |
| 22 | H22 | 2.2176  | 0.7252  | 0.7477  | H |
| 23 | C23 | 0.4678  | 2.6103  | -0.4528 | C |
| 24 | H24 | 0.8541  | 2.9963  | 0.4985  | H |
| 25 | H25 | 0.0173  | 3.4612  | -0.9678 | H |
| 26 | O26 | 3.2571  | -0.7160 | -0.3330 | O |
| 27 | C27 | 5.5738  | -1.1606 | -0.2046 | C |
| 28 | H28 | 5.3831  | -2.2166 | 0.0080  | H |
| 29 | H29 | 5.6747  | -1.0593 | -1.2891 | H |
| 30 | H30 | 6.4907  | -0.8400 | 0.2878  | H |

@<TRIPOS>BOND

1 1 2 1  
2 1 5 1  
3 1 20 2  
4 3 4 2  
5 3 26 1  
6 3 27 1  
7 5 6 2  
8 5 7 1  
9 6 8 1  
10 6 23 1  
11 7 9 Ar  
12 7 10 Ar  
13 8 18 1  
14 8 19 2  
15 9 11 Ar  
16 9 16 1  
17 10 13 Ar  
18 10 18 1  
19 11 12 1  
20 11 14 Ar  
21 13 14 Ar  
22 13 17 1  
23 14 15 1  
24 20 22 1  
25 20 26 1

```

26 21 23 1
27 23 24 1
28 23 25 1
29 27 28 1
30 27 29 1
31 27 30 1

```

str-[3,3]-TS1 optimized structure: transition state

@<TRIPOS>MOLECULE

Molecule Name

30 30

SMALL

NO\_CHARGES

@<TRIPOS>ATOM

|    |     |         |         |         |   |
|----|-----|---------|---------|---------|---|
| 1  | C1  | 0.5153  | -1.5024 | 1.7163  | C |
| 2  | H2  | 0.4512  | -2.5234 | 1.3531  | H |
| 3  | O3  | 1.0032  | -1.2764 | -0.7454 | O |
| 4  | C4  | 2.1192  | -0.8481 | -1.2313 | C |
| 5  | C5  | 2.3912  | -1.2507 | -2.6668 | C |
| 6  | H6  | 3.4625  | -1.2139 | -2.8700 | H |
| 7  | H7  | 1.9928  | -2.2479 | -2.8644 | H |
| 8  | H8  | 1.8828  | -0.5442 | -3.3322 | H |
| 9  | O9  | 2.9696  | -0.1305 | -0.6431 | O |
| 10 | C10 | 0.2160  | -0.4378 | 0.7111  | C |
| 11 | C11 | 0.9026  | 0.8331  | 0.7964  | C |
| 12 | C12 | -1.1760 | -0.3799 | 0.2194  | C |
| 13 | C13 | 0.3551  | 2.0530  | 0.2134  | C |
| 14 | C14 | -2.0188 | -1.5053 | 0.1753  | C |
| 15 | C15 | -1.6909 | 0.8495  | -0.2239 | C |
| 16 | C16 | -3.3233 | -1.4094 | -0.2874 | C |
| 17 | H17 | -3.9558 | -2.2905 | -0.3159 | H |
| 18 | C18 | -3.0075 | 0.9570  | -0.6828 | C |
| 19 | C19 | -3.8172 | -0.1705 | -0.7161 | C |
| 20 | H20 | -4.8381 | -0.0861 | -1.0760 | H |
| 21 | H21 | -1.6378 | -2.4644 | 0.5067  | H |
| 22 | H22 | -3.3633 | 1.9288  | -1.0066 | H |
| 23 | O23 | -0.9655 | 2.0068  | -0.2282 | O |
| 24 | O24 | 0.9273  | 3.1151  | 0.1142  | O |
| 25 | C25 | 0.7864  | -1.2593 | 2.9993  | C |
| 26 | H26 | 0.8387  | -0.2483 | 3.3915  | H |
| 27 | H27 | 0.9490  | -2.0727 | 3.6990  | H |
| 28 | C28 | 2.2755  | 0.7923  | 0.9933  | C |
| 29 | H29 | 2.7312  | 0.0098  | 1.5813  | H |
| 30 | H30 | 2.8452  | 1.7035  | 0.8547  | H |

@<TRIPOS>BOND

```

1 1 2 1
2 1 10 1
3 1 25 2
4 3 4 Ar

```

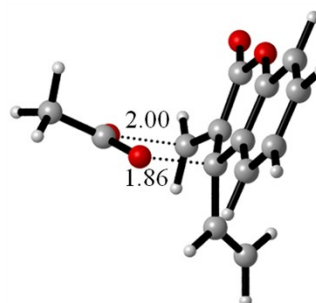

[3,3]-TS1

```

5 4 5 1
6 4 9 2
7 5 6 1
8 5 7 1
9 5 8 1
10 10 11 Ar
11 10 12 1
12 11 13 1
13 11 28 Ar
14 12 14 Ar
15 12 15 Ar
16 13 23 1
17 13 24 2
18 14 16 Ar
19 14 21 1
20 15 18 Ar
21 15 23 1
22 16 17 1
23 16 19 Ar
24 18 19 Ar
25 18 22 1
26 19 20 1
27 25 26 1
28 25 27 1
29 28 29 1
30 28 30 1

```

str-[3,5]-TS2 optimized structure: transition state

@<TRIPOS>MOLECULE

Molecule Name

30 30

SMALL

NO\_CHARGES

@<TRIPOS>ATOM

|    |     |         |         |         |   |
|----|-----|---------|---------|---------|---|
| 1  | C1  | -0.4188 | -1.7906 | -0.5610 | C |
| 2  | H2  | 0.1112  | -2.6412 | -0.1502 | F |
| 3  | O3  | -2.8833 | -1.4923 | 0.4620  | C |
| 4  | C4  | -3.3227 | -0.3018 | 0.5279  | C |
| 5  | C5  | -4.3668 | -0.0471 | 1.5974  | C |
| 6  | H6  | -4.8636 | -0.9750 | 1.8798  | F |
| 7  | H7  | -3.8597 | 0.3655  | 2.4757  | H |
| 8  | H8  | -5.0884 | 0.6929  | 1.2485  | H |
| 9  | O9  | -2.9975 | 0.7155  | -0.1595 | O |
| 10 | C10 | 0.2494  | -0.5637 | -0.5161 | C |
| 11 | C11 | -0.3421 | 0.7209  | -0.7243 | C |
| 12 | C12 | 1.6743  | -0.5533 | -0.1329 | C |
| 13 | C13 | 0.2980  | 1.9467  | -0.2463 | C |
| 14 | C14 | 2.4964  | -1.6984 | -0.1379 | C |
| 15 | C15 | 2.2734  | 0.6618  | 0.2411  | C |
| 16 | C16 | 3.8301  | -1.6388 | 0.2409  | C |
| 17 | H17 | 4.4384  | -2.5373 | 0.2195  | H |

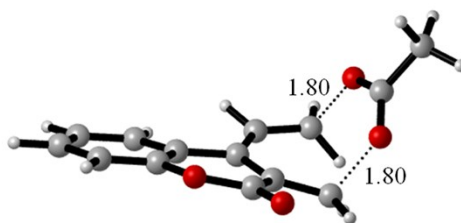

[3,5]-TS2

|    |     |         |         |         |   |
|----|-----|---------|---------|---------|---|
| 18 | C18 | 3.6120  | 0.7327  | 0.6380  | C |
| 19 | C19 | 4.3881  | -0.4180 | 0.6412  | C |
| 20 | H20 | 5.4298  | -0.3645 | 0.9425  | H |
| 21 | H21 | 2.0857  | -2.6440 | -0.4723 | H |
| 22 | H22 | 4.0132  | 1.6978  | 0.9271  | H |
| 23 | O23 | 1.5907  | 1.8439  | 0.2508  | O |
| 24 | O24 | -0.1930 | 3.0563  | -0.2481 | O |
| 25 | C25 | -1.7821 | -2.0329 | -0.8552 | C |
| 26 | H26 | -2.3000 | -1.5049 | -1.6428 | H |
| 27 | H27 | -2.0882 | -3.0726 | -0.7997 | H |
| 28 | C28 | -1.6189 | 0.9388  | -1.3008 | C |
| 29 | H29 | -1.9779 | 0.2758  | -2.0743 | H |
| 30 | H30 | -1.8562 | 1.9823  | -1.4676 | H |

@<TRIPOS>BOND

1 1 2 1  
 2 1 10 Ar  
 3 1 25 Ar  
 4 3 4 2  
 5 4 5 1  
 6 4 9 2  
 7 5 6 1  
 8 5 7 1  
 9 5 8 1  
 10 10 11 Ar  
 11 10 12 1  
 12 11 13 1  
 13 11 28 Ar  
 14 12 14 Ar  
 15 12 15 Ar  
 16 13 23 1  
 17 13 24 2  
 18 14 16 Ar  
 19 14 21 1  
 20 15 18 Ar  
 21 15 23 1  
 22 16 17 1  
 23 16 19 Ar  
 24 18 19 Ar  
 25 18 22 1  
 26 19 20 1  
 27 25 26 1  
 28 25 27 1  
 29 28 29 1  
 30 28 30 1

str-[3,3]-TS3 optimized structure: transition state

@<TRIPOS>MOLECULE

Molecule Name

30 30

SMALL

NO\_CHARGES

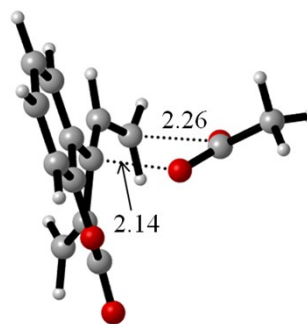

@<TRIPOS>ATOM

|    |     |         |         |         |   |
|----|-----|---------|---------|---------|---|
| 1  | C1  | 1.1229  | -0.6159 | 1.8049  | C |
| 2  | H2  | 0.7445  | -1.5514 | 2.2009  | H |
| 3  | O3  | 3.0584  | -1.1555 | -0.2508 | O |
| 4  | C4  | 2.0761  | -1.1988 | -1.0319 | C |
| 5  | C5  | 2.0643  | -2.2519 | -2.1329 | C |
| 6  | H6  | 1.6173  | -1.8457 | -3.0438 | H |
| 7  | H7  | 3.0785  | -2.6049 | -2.3305 | H |
| 8  | H8  | 1.4516  | -3.1024 | -1.8122 | H |
| 9  | O9  | 1.0400  | -0.4401 | -0.9822 | O |
| 10 | C10 | 0.2811  | 0.1311  | 0.9363  | C |
| 11 | C11 | 0.5306  | 1.5496  | 0.6174  | C |
| 12 | C12 | -1.0815 | -0.2984 | 0.6148  | C |
| 13 | C13 | -0.0744 | 2.0849  | -0.6411 | C |
| 14 | C14 | -1.7424 | -1.3750 | 1.2343  | C |
| 15 | C15 | -1.7685 | 0.3992  | -0.3987 | C |
| 16 | C16 | -3.0293 | -1.7385 | 0.8609  | C |
| 17 | H17 | -3.5245 | -2.5647 | 1.3600  | H |
| 18 | C18 | -3.0523 | 0.0286  | -0.7938 | C |
| 19 | C19 | -3.6811 | -1.0387 | -0.1612 | C |
| 20 | H20 | -4.6843 | -1.3237 | -0.4625 | H |
| 21 | H21 | -1.2482 | -1.9213 | 2.0293  | H |
| 22 | H22 | -3.5335 | 0.5888  | -1.5874 | H |
| 23 | O23 | -1.2201 | 1.4593  | -1.0758 | O |
| 24 | O24 | 0.3200  | 3.0486  | -1.2419 | O |
| 25 | C25 | 2.4738  | -0.4183 | 1.8028  | C |
| 26 | H26 | 2.9311  | 0.4715  | 1.4009  | H |
| 27 | H27 | 3.1323  | -1.1014 | 2.3270  | H |
| 28 | C28 | 1.1553  | 2.4211  | 1.4237  | C |
| 29 | H29 | 1.5424  | 2.1267  | 2.3916  | H |
| 30 | H30 | 1.2591  | 3.4562  | 1.1180  | H |

@<TRIPOS>BOND

|    |    |    |    |
|----|----|----|----|
| 1  | 1  | 2  | 1  |
| 2  | 1  | 10 | Ar |
| 3  | 1  | 25 | 2  |
| 4  | 3  | 4  | 2  |
| 5  | 4  | 5  | 1  |
| 6  | 4  | 9  | 2  |
| 7  | 5  | 6  | 1  |
| 8  | 5  | 7  | 1  |
| 9  | 5  | 8  | 1  |
| 10 | 10 | 11 | 1  |
| 11 | 10 | 12 | 1  |
| 12 | 11 | 13 | 1  |
| 13 | 11 | 28 | 2  |
| 14 | 12 | 14 | Ar |
| 15 | 12 | 15 | Ar |
| 16 | 13 | 23 | 1  |
| 17 | 13 | 24 | 2  |
| 18 | 14 | 16 | Ar |
| 19 | 14 | 21 | 1  |
| 20 | 15 | 18 | Ar |
| 21 | 15 | 23 | 1  |
| 22 | 16 | 17 | 1  |



```

23 16 19 Ar
24 18 19 Ar
25 18 22 1
26 19 20 1
27 25 26 1
28 25 27 1
29 28 29 1
30 28 30 1

```

str-[1,5]-H-shift-TS4 optimized structure: transition state

@<TRIPOS>MOLECULE

Molecule Name

30 30

SMALL

NO\_CHARGES

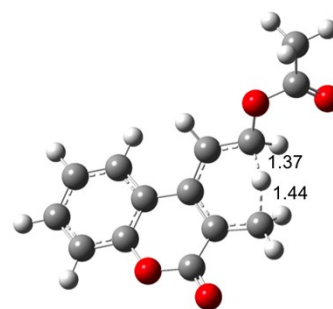

[1,5]-H-shift-TS4

@<TRIPOS>ATOM

|    |     |         |         |         |   |
|----|-----|---------|---------|---------|---|
| 1  | C1  | -0.8348 | -0.6943 | -0.2472 | C |
| 2  | H2  | -0.8173 | -1.6868 | 0.1948  | H |
| 3  | C3  | -4.3983 | -0.4790 | 0.0953  | C |
| 4  | O4  | -4.7381 | 0.1877  | -0.8530 | O |
| 5  | C5  | 0.3750  | -0.0101 | -0.3645 | C |
| 6  | C6  | 0.3682  | 1.4105  | -0.3710 | C |
| 7  | C7  | 1.6646  | -0.6887 | -0.2003 | C |
| 8  | C8  | 1.5096  | 2.1429  | 0.2139  | C |
| 9  | C9  | 1.8630  | -2.0625 | -0.4176 | C |
| 10 | C10 | 2.7744  | 0.0816  | 0.1780  | C |
| 11 | C11 | 3.1143  | -2.6427 | -0.2442 | C |
| 12 | H12 | 3.2473  | -3.7050 | -0.4214 | H |
| 13 | C13 | 4.0362  | -0.4875 | 0.3538  | C |
| 14 | C14 | 4.2023  | -1.8523 | 0.1445  | C |
| 15 | H15 | 5.1824  | -2.2999 | 0.2768  | H |
| 16 | H16 | 1.0266  | -2.6692 | -0.7506 | H |
| 17 | H17 | 4.8595  | 0.1518  | 0.6531  | H |
| 18 | O18 | 2.6754  | 1.4307  | 0.4184  | O |
| 19 | O19 | 1.5090  | 3.3172  | 0.5037  | O |
| 20 | C20 | -2.1082 | -0.0635 | -0.3551 | C |
| 21 | H21 | -1.7610 | 1.2229  | -0.0562 | H |
| 22 | H22 | -2.5209 | 0.2374  | -1.3170 | H |
| 23 | C23 | -0.8129 | 2.1371  | -0.6359 | C |
| 24 | H24 | -1.3091 | 1.9967  | -1.5942 | H |
| 25 | H25 | -0.8375 | 3.1634  | -0.2759 | H |
| 26 | C26 | -5.3123 | -1.1754 | 1.0683  | C |
| 27 | H27 | -5.0704 | -2.2408 | 1.1166  | H |
| 28 | H28 | -5.1685 | -0.7626 | 2.0713  | H |

|    |     |         |         |        |   |
|----|-----|---------|---------|--------|---|
| 29 | H29 | -6.3464 | -1.0378 | 0.7554 | H |
| 30 | O30 | -3.0877 | -0.6940 | 0.4358 | O |

@<TRIPOS>BOND

|    |    |    |    |
|----|----|----|----|
| 1  | 1  | 2  | 1  |
| 2  | 1  | 5  | Ar |
| 3  | 1  | 20 | Ar |
| 4  | 3  | 4  | 2  |
| 5  | 3  | 26 | 1  |
| 6  | 3  | 30 | 1  |
| 7  | 5  | 6  | Ar |
| 8  | 5  | 7  | 1  |
| 9  | 6  | 8  | 1  |
| 10 | 6  | 23 | Ar |
| 11 | 7  | 9  | Ar |
| 12 | 7  | 10 | Ar |
| 13 | 8  | 18 | 1  |
| 14 | 8  | 19 | 2  |
| 15 | 9  | 11 | Ar |
| 16 | 9  | 16 | 1  |
| 17 | 10 | 13 | Ar |
| 18 | 10 | 18 | 1  |
| 19 | 11 | 12 | 1  |
| 20 | 11 | 14 | Ar |
| 21 | 13 | 14 | Ar |
| 22 | 13 | 17 | 1  |
| 23 | 14 | 15 | 1  |
| 24 | 20 | 22 | 1  |
| 25 | 20 | 30 | 1  |
| 26 | 23 | 24 | 1  |
| 27 | 23 | 25 | 1  |
| 28 | 26 | 27 | 1  |
| 29 | 26 | 28 | 1  |
| 30 | 26 | 29 | 1  |

**str-3 optimized structure: minimum**

@<TRIPOS>MOLECULE

Molecule Name

31 32

SMALL

NO\_CHARGES

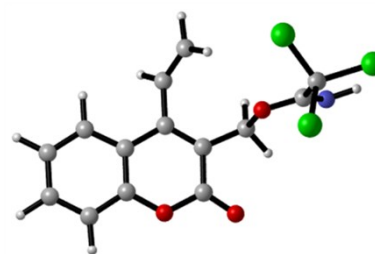

3

@<TRIPOS>ATOM

|    |     |         |         |         |   |
|----|-----|---------|---------|---------|---|
| 1  | C1  | -1.6684 | 2.1847  | -0.8836 | C |
| 2  | H2  | -2.4507 | 2.7624  | -1.3730 | H |
| 3  | C3  | 2.4663  | -0.0534 | -0.8592 | C |
| 4  | C4  | 3.3691  | -0.0117 | 0.4032  | C |
| 5  | O5  | 1.1855  | 0.0087  | -0.4715 | O |
| 6  | C6  | -2.0023 | 0.7713  | -0.6101 | C |
| 7  | C7  | -1.1542 | -0.2664 | -0.8966 | C |
| 8  | C8  | -3.3175 | 0.4764  | -0.0477 | C |
| 9  | C9  | -1.5356 | -1.6612 | -0.6290 | C |
| 10 | C10 | -4.2588 | 1.4616  | 0.3148  | C |

|    |      |         |         |         |    |
|----|------|---------|---------|---------|----|
| 11 | C11  | -3.6637 | -0.8685 | 0.1748  | C  |
| 12 | C12  | -5.4918 | 1.1121  | 0.8461  | C  |
| 13 | H13  | -6.2025 | 1.8859  | 1.1175  | H  |
| 14 | C14  | -4.9016 | -1.2316 | 0.7095  | C  |
| 15 | C15  | -5.8146 | -0.2384 | 1.0393  | C  |
| 16 | H16  | -6.7788 | -0.5133 | 1.4554  | H  |
| 17 | H17  | -4.0066 | 2.5085  | 0.1899  | H  |
| 18 | H18  | -5.1168 | -2.2840 | 0.8574  | H  |
| 19 | O19  | -2.8026 | -1.8850 | -0.1142 | O  |
| 20 | O20  | -0.8413 | -2.6278 | -0.8452 | O  |
| 21 | C21  | -0.5271 | 2.7952  | -0.5477 | C  |
| 22 | H22  | 0.2685  | 2.2799  | -0.0200 | H  |
| 23 | H23  | -0.3717 | 3.8441  | -0.7811 | H  |
| 24 | C24  | 0.1945  | -0.1128 | -1.5339 | C  |
| 25 | H25  | 0.2527  | 0.7764  | -2.1634 | H  |
| 26 | H26  | 0.4411  | -0.9957 | -2.1235 | H  |
| 27 | N27  | 2.8261  | -0.1322 | -2.0685 | N  |
| 28 | H28  | 3.8381  | -0.1804 | -2.1667 | H  |
| 29 | C129 | 5.1087  | -0.0924 | -0.0491 | C1 |
| 30 | C130 | 2.9779  | -1.4010 | 1.4695  | C1 |
| 31 | C131 | 3.0807  | 1.5364  | 1.2888  | C1 |

@<TRIPOS>BOND

1 1 2 1  
2 1 6 1  
3 1 21 2  
4 3 4 1  
5 3 5 Ar  
6 3 27 2  
7 4 29 1  
8 4 30 1  
9 4 31 1  
10 5 24 1  
11 6 7 2  
12 6 8 1  
13 7 9 1  
14 7 24 1  
15 8 10 Ar  
16 8 11 Ar  
17 9 19 1  
18 9 20 2  
19 10 12 Ar  
20 10 17 1  
21 11 14 Ar  
22 11 19 1  
23 12 13 1  
24 12 15 Ar  
25 14 15 Ar  
26 14 18 1  
27 15 16 1  
28 21 22 1  
29 21 23 1  
30 24 25 1  
31 24 26 1  
32 27 28 1

str-6 optimized structure: minimum

@<TRIPOS>MOLECULE

Molecule Name

31 32

SMALL

NO\_CHARGES

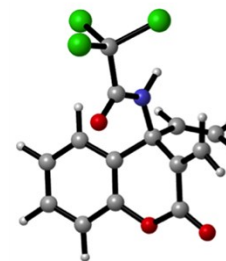

6

@<TRIPOS>ATOM

|    |      |         |         |         |    |
|----|------|---------|---------|---------|----|
| 1  | C1   | -1.3315 | -0.8814 | -2.0660 | C  |
| 2  | H2   | -1.1618 | -0.0663 | -2.7678 | H  |
| 3  | C3   | 1.2513  | 0.0301  | 0.4359  | C  |
| 4  | C4   | 2.8074  | 0.1039  | 0.1624  | C  |
| 5  | O5   | 0.7971  | 0.3669  | 1.5060  | O  |
| 6  | C6   | -0.9373 | -0.5358 | -0.6247 | C  |
| 7  | C7   | -1.3985 | -1.6182 | 0.3483  | C  |
| 8  | C8   | -1.6222 | 0.7903  | -0.2863 | C  |
| 9  | C9   | -2.8181 | -1.5938 | 0.8209  | C  |
| 10 | C10  | -1.1013 | 2.0289  | -0.6745 | C  |
| 11 | C11  | -2.8661 | 0.7699  | 0.3467  | C  |
| 12 | C12  | -1.7958 | 3.2103  | -0.4253 | C  |
| 13 | H13  | -1.3684 | 4.1612  | -0.7265 | H  |
| 14 | C14  | -3.5754 | 1.9423  | 0.6023  | C  |
| 15 | C15  | -3.0369 | 3.1654  | 0.2140  | C  |
| 16 | H16  | -3.5843 | 4.0811  | 0.4140  | H  |
| 17 | H17  | -0.1352 | 2.0639  | -1.1680 | H  |
| 18 | H18  | -4.5351 | 1.8706  | 1.1021  | H  |
| 19 | O19  | -3.4887 | -0.4039 | 0.7380  | O  |
| 20 | O20  | -3.4016 | -2.5495 | 1.2707  | O  |
| 21 | C21  | -1.8607 | -2.0284 | -2.4881 | C  |
| 22 | H22  | -2.0620 | -2.8594 | -1.8203 | H  |
| 23 | H23  | -2.1193 | -2.1630 | -3.5336 | H  |
| 24 | C24  | -0.6352 | -2.6332 | 0.7621  | C  |
| 25 | C125 | 3.1131  | 1.4016  | -1.0626 | Cl |
| 26 | C126 | 3.6744  | 0.4739  | 1.6612  | Cl |
| 27 | C127 | 3.3980  | -1.4790 | -0.5037 | Cl |
| 28 | N28  | 0.5304  | -0.3972 | -0.6337 | N  |
| 29 | H29  | -1.0507 | -3.3852 | 1.4229  | H  |
| 30 | H30  | 0.4028  | -2.7283 | 0.4646  | H  |
| 31 | H31  | 1.0160  | -0.7431 | -1.4488 | H  |

@<TRIPOS>BOND

|    |   |    |    |
|----|---|----|----|
| 1  | 1 | 2  | 1  |
| 2  | 1 | 6  | 1  |
| 3  | 1 | 21 | 2  |
| 4  | 3 | 4  | 1  |
| 5  | 3 | 5  | 2  |
| 6  | 3 | 28 | Ar |
| 7  | 4 | 25 | 1  |
| 8  | 4 | 26 | 1  |
| 9  | 4 | 27 | 1  |
| 10 | 6 | 7  | 1  |

```

11 6 8 1
12 6 28 1
13 7 9 1
14 7 24 2
15 8 10 Ar
16 8 11 Ar
17 9 19 1
18 9 20 2
19 10 12 Ar
20 10 17 1
21 11 14 Ar
22 11 19 1
23 12 13 1
24 12 15 Ar
25 14 15 Ar
26 14 18 1
27 15 16 1
28 21 22 1
29 21 23 1
30 24 29 1
31 24 30 1
32 28 31 1

```

**str-7 optimized structure: minimum**

@<TRIPOS>MOLECULE

Molecule Name

31 32

SMALL

NO\_CHARGES

@<TRIPOS>ATOM

|    |     |         |         |         |   |
|----|-----|---------|---------|---------|---|
| 1  | C1  | -0.7100 | -0.0403 | -0.7422 | C |
| 2  | H2  | -0.4056 | 1.0039  | -0.7408 | H |
| 3  | C3  | 2.7890  | -0.3326 | -0.7388 | C |
| 4  | C4  | 3.9065  | 0.2038  | 0.2370  | C |
| 5  | O5  | 3.0212  | -0.4681 | -1.9232 | O |
| 6  | C6  | -2.0193 | -0.3193 | -0.5523 | C |
| 7  | C7  | -2.5801 | -1.6852 | -0.4733 | C |
| 8  | C8  | -3.0185 | 0.7452  | -0.3228 | C |
| 9  | C9  | -3.6690 | -1.9289 | 0.5301  | C |
| 10 | C10 | -2.9055 | 2.0564  | -0.8124 | C |
| 11 | C11 | -4.1556 | 0.4320  | 0.4356  | C |
| 12 | C12 | -3.8725 | 3.0162  | -0.5305 | C |
| 13 | H13 | -3.7654 | 4.0216  | -0.9246 | H |
| 14 | C14 | -5.1308 | 1.3822  | 0.7298  | C |
| 15 | C15 | -4.9850 | 2.6795  | 0.2466  | C |
| 16 | H16 | -5.7439 | 3.4234  | 0.4676  | H |
| 17 | H17 | -2.0585 | 2.3137  | -1.4405 | H |
| 18 | H18 | -5.9839 | 1.0862  | 1.3302  | H |
| 19 | O19 | -4.3597 | -0.8297 | 0.9713  | O |
| 20 | O20 | -3.9759 | -3.0128 | 0.9599  | O |
| 21 | C21 | 0.4253  | -1.0118 | -0.8913 | C |

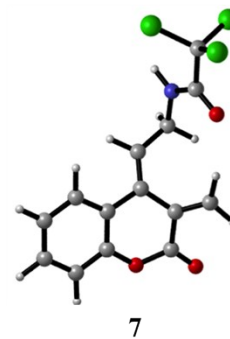

|    |      |         |         |         |    |
|----|------|---------|---------|---------|----|
| 22 | H22  | 0.1361  | -2.0154 | -0.5596 | H  |
| 23 | H23  | 0.7555  | -1.0944 | -1.9326 | H  |
| 24 | C24  | -2.2259 | -2.7281 | -1.2428 | C  |
| 25 | H25  | -1.5118 | -2.6290 | -2.0519 | H  |
| 26 | H26  | -2.6881 | -3.6963 | -1.0855 | H  |
| 27 | N27  | 1.5976  | -0.5658 | -0.1396 | N  |
| 28 | C128 | 5.4877  | 0.1699  | -0.5635 | Cl |
| 29 | C129 | 3.4794  | 1.9050  | 0.6857  | Cl |
| 30 | C130 | 3.9739  | -0.8004 | 1.7455  | Cl |
| 31 | H31  | 1.5110  | -0.4513 | 0.8601  | H  |

@<TRIPOS>BOND

1 1 2 1  
2 1 6 2  
3 1 21 1  
4 3 4 1  
5 3 5 2  
6 3 27 Ar  
7 4 28 1  
8 4 29 1  
9 4 30 1  
10 6 7 1  
11 6 8 1  
12 7 9 1  
13 7 24 2  
14 8 10 Ar  
15 8 11 Ar  
16 9 19 1  
17 9 20 2  
18 10 12 Ar  
19 10 17 1  
20 11 14 Ar  
21 11 19 1  
22 12 13 1  
23 12 15 Ar  
24 14 15 Ar  
25 14 18 1  
26 15 16 1  
27 21 22 1  
28 21 23 1  
29 21 27 1  
30 24 25 1  
31 24 26 1  
32 27 31 1

str-8 optimized structure: minimum

@<TRIPOS>MOLECULE

Molecule Name

31 32

SMALL

NO\_CHARGES

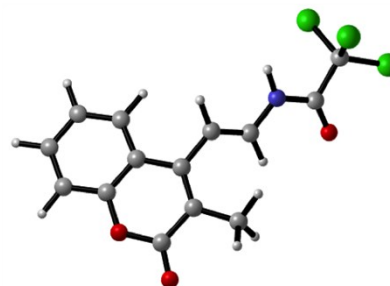

@<TRIPOS>ATOM

|    |      |         |         |         |    |
|----|------|---------|---------|---------|----|
| 1  | C1   | -0.7470 | 0.1293  | 0.4809  | C  |
| 2  | H2   | -0.6182 | 0.9674  | 1.1642  | H  |
| 3  | C3   | 2.7352  | -0.4847 | -0.4608 | C  |
| 4  | C4   | 4.0942  | 0.1755  | -0.0274 | C  |
| 5  | O5   | 2.6964  | -1.3744 | -1.2809 | O  |
| 6  | C6   | -2.1331 | -0.2997 | 0.2357  | C  |
| 7  | C7   | -2.5203 | -1.6148 | 0.1842  | C  |
| 8  | C8   | -3.1431 | 0.7504  | 0.0861  | C  |
| 9  | C9   | -3.9302 | -1.9714 | -0.0450 | C  |
| 10 | C10  | -2.8575 | 2.1308  | 0.0816  | C  |
| 11 | C11  | -4.4855 | 0.3702  | -0.0836 | C  |
| 12 | C12  | -3.8668 | 3.0746  | -0.0514 | C  |
| 13 | H13  | -3.6207 | 4.1315  | -0.0509 | H  |
| 14 | C14  | -5.5101 | 1.3094  | -0.2177 | C  |
| 15 | C15  | -5.1982 | 2.6626  | -0.1953 | C  |
| 16 | H16  | -5.9892 | 3.3986  | -0.2996 | H  |
| 17 | H17  | -1.8288 | 2.4624  | 0.1657  | H  |
| 18 | H18  | -6.5272 | 0.9546  | -0.3418 | H  |
| 19 | O19  | -4.8512 | -0.9419 | -0.1389 | O  |
| 20 | O20  | -4.3504 | -3.1036 | -0.1358 | O  |
| 21 | C21  | 0.3442  | -0.3988 | -0.0978 | C  |
| 22 | H22  | -0.7321 | -2.5514 | 0.9565  | H  |
| 23 | H23  | 0.3095  | -1.1955 | -0.8299 | H  |
| 24 | C24  | -1.6229 | -2.8070 | 0.3803  | C  |
| 25 | H25  | -1.2964 | -3.2263 | -0.5794 | H  |
| 26 | H26  | -2.1764 | -3.5996 | 0.8874  | H  |
| 27 | N27  | 1.6391  | 0.0470  | 0.1646  | N  |
| 28 | C128 | 5.4474  | -0.6179 | -0.8453 | C1 |
| 29 | C129 | 4.0511  | 1.9324  | -0.4661 | C1 |
| 30 | C130 | 4.2853  | 0.0234  | 1.7679  | C1 |
| 31 | H31  | 1.7699  | 0.7849  | 0.8438  | H  |

@<TRIPOS>BOND

|    |    |    |    |
|----|----|----|----|
| 1  | 1  | 2  | 1  |
| 2  | 1  | 6  | 1  |
| 3  | 1  | 21 | 2  |
| 4  | 3  | 4  | 1  |
| 5  | 3  | 5  | 2  |
| 6  | 3  | 27 | Ar |
| 7  | 4  | 28 | 1  |
| 8  | 4  | 29 | 1  |
| 9  | 4  | 30 | 1  |
| 10 | 6  | 7  | 2  |
| 11 | 6  | 8  | 1  |
| 12 | 7  | 9  | 1  |
| 13 | 7  | 24 | 1  |
| 14 | 8  | 10 | Ar |
| 15 | 8  | 11 | Ar |
| 16 | 9  | 19 | 1  |
| 17 | 9  | 20 | 2  |
| 18 | 10 | 12 | Ar |
| 19 | 10 | 17 | 1  |
| 20 | 11 | 14 | Ar |
| 21 | 11 | 19 | 1  |

22 12 13 1  
 23 12 15 Ar  
 24 14 15 Ar  
 25 14 18 1  
 26 15 16 1  
 27 21 23 1  
 28 21 27 1  
 29 22 24 1  
 30 24 25 1  
 31 24 26 1  
 32 27 31 1

**str-10 optimized structure: minimum**

@<TRIPOS>MOLECULE

Molecule Name

31 32

SMALL

NO\_CHARGES

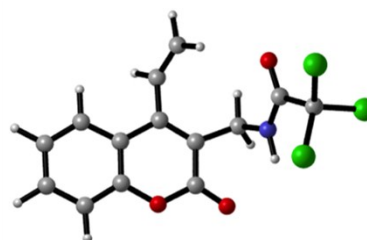

**10**

@<TRIPOS>ATOM

|    |      |         |         |         |    |
|----|------|---------|---------|---------|----|
| 1  | C1   | -2.0028 | 2.4020  | -0.6912 | C  |
| 2  | H2   | -2.8798 | 2.8701  | -1.1365 | H  |
| 3  | C3   | 2.1335  | 0.6416  | -0.2314 | C  |
| 4  | C4   | 3.3675  | -0.1191 | 0.3909  | C  |
| 5  | C5   | -2.0986 | 0.9304  | -0.5484 | C  |
| 6  | C6   | -1.1428 | 0.0515  | -0.9827 | C  |
| 7  | C7   | -3.3276 | 0.3942  | 0.0357  | C  |
| 8  | C8   | -1.3448 | -1.3974 | -0.8829 | C  |
| 9  | C9   | -4.3606 | 1.1965  | 0.5626  | C  |
| 10 | C10  | -3.4944 | -1.0002 | 0.0998  | C  |
| 11 | C11  | -5.5060 | 0.6268  | 1.0997  | C  |
| 12 | H12  | -6.2883 | 1.2628  | 1.5006  | H  |
| 13 | C13  | -4.6424 | -1.5858 | 0.6350  | C  |
| 14 | C14  | -5.6492 | -0.7674 | 1.1308  | C  |
| 15 | H15  | -6.5453 | -1.2137 | 1.5504  | H  |
| 16 | H16  | -4.2457 | 2.2744  | 0.5608  | H  |
| 17 | H17  | -4.7166 | -2.6674 | 0.6545  | H  |
| 18 | O18  | -2.5292 | -1.8543 | -0.3544 | O  |
| 19 | O19  | -0.5352 | -2.2279 | -1.2530 | O  |
| 20 | C20  | -0.9932 | 3.1788  | -0.2868 | C  |
| 21 | H21  | -0.0957 | 2.7880  | 0.1821  | H  |
| 22 | H22  | -1.0432 | 4.2543  | -0.4292 | H  |
| 23 | C23  | 0.1556  | 0.4133  | -1.6781 | C  |
| 24 | H24  | 0.2767  | 1.4898  | -1.7605 | H  |
| 25 | H25  | 0.1469  | -0.0194 | -2.6843 | H  |
| 26 | C126 | 4.0229  | 0.8100  | 1.7596  | Cl |
| 27 | C127 | 4.6178  | -0.2639 | -0.9063 | Cl |
| 28 | C128 | 2.9162  | -1.7757 | 0.9629  | Cl |
| 29 | N29  | 1.3270  | -0.1258 | -0.9880 | N  |
| 30 | O30  | 2.0224  | 1.8436  | -0.0596 | O  |
| 31 | H31  | 1.4022  | -1.1354 | -0.9802 | H  |

@<TRIPOS>BOND

1 1 2 1



```

2 1 5 1
3 1 20 2
4 3 4 1
5 3 29 Ar
6 3 30 2
7 4 26 1
8 4 27 1
9 4 28 1
10 5 6 2
11 5 7 1
12 6 8 1
13 6 23 1
14 7 9 Ar
15 7 10 Ar
16 8 18 1
17 8 19 2
18 9 11 Ar
19 9 16 1
20 10 13 Ar
21 10 18 1
22 11 12 1
23 11 14 Ar
24 13 14 Ar
25 13 17 1
26 14 15 1
27 20 21 1
28 20 22 1
29 23 24 1
30 23 25 1
31 23 29 1
32 29 31 1

```

str-[3,3]-TS5 optimized structure: transition state

@<TRIPOS>MOLECULE

Molecule Name

31 31

SMALL

NO\_CHARGES

@<TRIPOS>ATOM

|    |     |         |         |         |   |
|----|-----|---------|---------|---------|---|
| 1  | C1  | -1.5928 | 1.6779  | 1.9664  | C |
| 2  | H2  | -1.3521 | 1.1404  | 2.8778  | H |
| 3  | C3  | 1.4351  | 0.4580  | 0.6115  | C |
| 4  | C4  | 2.5271  | -0.5739 | 0.1516  | C |
| 5  | O5  | 1.6651  | 1.6505  | 0.2441  | O |
| 6  | C6  | -1.3344 | 0.9503  | 0.6839  | C |
| 7  | C7  | -0.8750 | 1.6775  | -0.4650 | C |
| 8  | C8  | -2.1987 | -0.2184 | 0.4114  | C |
| 9  | C9  | -1.0475 | 1.1708  | -1.8235 | C |
| 10 | C10 | -2.8240 | -0.9657 | 1.4273  | C |

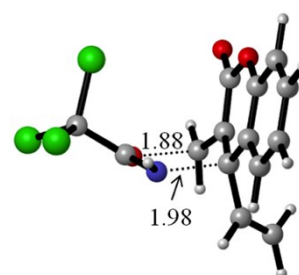

[3,3]-TS5

|    |      |         |         |         |    |
|----|------|---------|---------|---------|----|
| 11 | C11  | -2.4159 | -0.6041 | -0.9228 | C  |
| 12 | C12  | -3.6275 | -2.0566 | 1.1259  | C  |
| 13 | H13  | -4.0989 | -2.6206 | 1.9239  | H  |
| 14 | C14  | -3.2316 | -1.6965 | -1.2345 | C  |
| 15 | C15  | -3.8303 | -2.4204 | -0.2119 | C  |
| 16 | H16  | -4.4607 | -3.2701 | -0.4555 | H  |
| 17 | H17  | -2.6786 | -0.6774 | 2.4626  | H  |
| 18 | H18  | -3.3751 | -1.9519 | -2.2785 | H  |
| 19 | O19  | -1.8708 | 0.0563  | -1.9841 | O  |
| 20 | O20  | -0.5814 | 1.6545  | -2.8296 | O  |
| 21 | C21  | -2.1399 | 2.8925  | 2.0289  | C  |
| 22 | H22  | -2.4027 | 3.4502  | 1.1354  | H  |
| 23 | H23  | -2.3525 | 3.3590  | 2.9855  | H  |
| 24 | C24  | 0.1422  | 2.6258  | -0.2733 | C  |
| 25 | H25  | 0.1686  | 3.2158  | 0.6315  | H  |
| 26 | H26  | 0.5824  | 3.0727  | -1.1567 | H  |
| 27 | C127 | 2.1804  | -0.9677 | -1.5737 | C1 |
| 28 | C128 | 4.1565  | 0.1420  | 0.3031  | C1 |
| 29 | C129 | 2.4640  | -2.0928 | 1.1319  | C1 |
| 30 | N30  | 0.3519  | 0.0638  | 1.2286  | N  |
| 31 | H31  | 0.2658  | -0.9444 | 1.3330  | H  |

@<TRIPOS>BOND

1 1 2 1  
2 1 6 1  
3 1 21 2  
4 3 4 1  
5 3 5 2  
6 3 30 2  
7 4 27 1  
8 4 28 1  
9 4 29 1  
10 6 7 Ar  
11 6 8 1  
12 7 9 1  
13 7 24 Ar  
14 8 10 Ar  
15 8 11 Ar  
16 9 19 1  
17 9 20 2  
18 10 12 Ar  
19 10 17 1  
20 11 14 Ar  
21 11 19 1  
22 12 13 1  
23 12 15 Ar  
24 14 15 Ar  
25 14 18 1  
26 15 16 1  
27 21 22 1  
28 21 23 1  
29 24 25 1  
30 24 26 1  
31 30 31 1

str-[3,5]-TS6 optimized structure: transition state

@<TRIPOS>MOLECULE

Molecule Name

31 31

SMALL

NO\_CHARGES

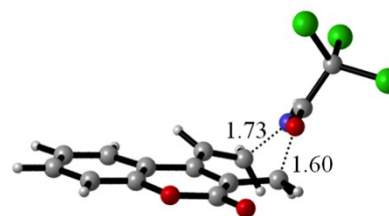

[3,5]-TS6

@<TRIPOS>ATOM

|    |      |         |         |         |    |
|----|------|---------|---------|---------|----|
| 1  | C1   | 0.9070  | -1.5406 | -1.1087 | C  |
| 2  | H2   | 1.1590  | -2.4908 | -0.6558 | H  |
| 3  | C3   | -1.9598 | -0.1370 | -0.4553 | C  |
| 4  | C4   | -3.2323 | -0.1171 | 0.4304  | C  |
| 5  | O5   | -1.2203 | 0.8898  | -0.2399 | O  |
| 6  | C6   | 1.6571  | -0.4158 | -0.7394 | C  |
| 7  | C7   | 1.2373  | 0.9342  | -0.8711 | C  |
| 8  | C8   | 2.9746  | -0.6236 | -0.1021 | C  |
| 9  | C9   | 2.0132  | 2.0500  | -0.3623 | C  |
| 10 | C10  | 3.5829  | -1.8858 | 0.0519  | C  |
| 11 | C11  | 3.6998  | 0.4906  | 0.3542  | C  |
| 12 | C12  | 4.8200  | -2.0316 | 0.6637  | C  |
| 13 | H13  | 5.2586  | -3.0192 | 0.7665  | H  |
| 14 | C14  | 4.9473  | 0.3575  | 0.9735  | C  |
| 15 | C15  | 5.5037  | -0.9033 | 1.1339  | C  |
| 16 | H16  | 6.4727  | -1.0088 | 1.6124  | H  |
| 17 | H17  | 3.0847  | -2.7656 | -0.3372 | H  |
| 18 | H18  | 5.4522  | 1.2565  | 1.3096  | H  |
| 19 | O19  | 3.2466  | 1.7682  | 0.2155  | O  |
| 20 | O20  | 1.6930  | 3.2249  | -0.3897 | O  |
| 21 | C21  | -0.2140 | -1.5595 | -1.9965 | C  |
| 22 | H22  | -0.1923 | -0.8907 | -2.8517 | H  |
| 23 | H23  | -0.5013 | -2.5609 | -2.3138 | H  |
| 24 | C24  | -0.0999 | 1.3337  | -1.2986 | C  |
| 25 | H25  | -0.5032 | 0.9301  | -2.2208 | H  |
| 26 | H26  | -0.2056 | 2.4143  | -1.2601 | H  |
| 27 | N27  | -1.7306 | -1.0957 | -1.2989 | N  |
| 28 | C128 | -4.2403 | -1.6067 | 0.2180  | C1 |
| 29 | C129 | -2.7430 | -0.0077 | 2.1516  | C1 |
| 30 | C130 | -4.2080 | 1.3118  | -0.0382 | C1 |
| 31 | H31  | -2.4363 | -1.8242 | -1.3179 | H  |

@<TRIPOS>BOND

|    |   |    |    |
|----|---|----|----|
| 1  | 1 | 2  | 1  |
| 2  | 1 | 6  | Ar |
| 3  | 1 | 21 | Ar |
| 4  | 3 | 4  | 1  |
| 5  | 3 | 5  | 2  |
| 6  | 3 | 27 | 2  |
| 7  | 4 | 28 | 1  |
| 8  | 4 | 29 | 1  |
| 9  | 4 | 30 | 1  |
| 10 | 6 | 7  | Ar |
| 11 | 6 | 8  | 1  |

```

12 7 9 1
13 7 24 1
14 8 10 Ar
15 8 11 Ar
16 9 19 1
17 9 20 2
18 10 12 Ar
19 10 17 1
20 11 14 Ar
21 11 19 1
22 12 13 1
23 12 15 Ar
24 14 15 Ar
25 14 18 1
26 15 16 1
27 21 22 1
28 21 23 1
29 24 25 1
30 24 26 1
31 27 31 1

```

str-[1,3]-TS7 optimized structure: transition state

@<TRIPOS>MOLECULE

Molecule Name

31 31

SMALL

NO\_CHARGES

@<TRIPOS>ATOM

|    |     |         |         |         |   |
|----|-----|---------|---------|---------|---|
| 1  | C1  | -1.7679 | -2.2019 | 1.0876  | C |
| 2  | H2  | -2.6455 | -2.7931 | 1.3419  | H |
| 3  | C3  | 2.0811  | 0.1393  | 0.4432  | C |
| 4  | C4  | 3.3724  | 0.0250  | -0.4536 | C |
| 5  | O5  | 1.8445  | -0.8976 | 1.1165  | O |
| 6  | C6  | -2.0541 | -0.7899 | 0.7846  | C |
| 7  | C7  | -1.2881 | 0.2834  | 1.2559  | C |
| 8  | C8  | -3.2294 | -0.4994 | -0.0099 | C |
| 9  | C9  | -1.6951 | 1.6852  | 0.9908  | C |
| 10 | C10 | -4.0576 | -1.4980 | -0.5795 | C |
| 11 | C11 | -3.5522 | 0.8470  | -0.2893 | C |
| 12 | C12 | -5.1518 | -1.1640 | -1.3566 | C |
| 13 | H13 | -5.7711 | -1.9452 | -1.7842 | H |
| 14 | C14 | -4.6551 | 1.1915  | -1.0740 | C |
| 15 | C15 | -5.4531 | 0.1863  | -1.6009 | C |
| 16 | H16 | -6.3106 | 0.4489  | -2.2124 | H |
| 17 | H17 | -3.8154 | -2.5416 | -0.4199 | H |
| 18 | H18 | -4.8569 | 2.2414  | -1.2536 | H |
| 19 | O19 | -2.8095 | 1.8787  | 0.1875  | O |
| 20 | O20 | -1.1555 | 2.6651  | 1.4346  | O |
| 21 | C21 | -0.5789 | -2.8154 | 1.0135  | C |
| 22 | C22 | -0.1414 | 0.1511  | 2.0702  | C |

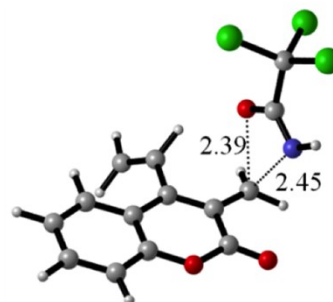

[1,3]-TS7

|    |      |         |         |         |    |
|----|------|---------|---------|---------|----|
| 23 | H23  | 0.2624  | 1.0428  | 2.5226  | H  |
| 24 | H24  | 0.1186  | -0.8057 | 2.4885  | H  |
| 25 | N25  | 1.3472  | 1.2043  | 0.4545  | N  |
| 26 | C126 | 3.7515  | 1.5363  | -1.3793 | Cl |
| 27 | C127 | 4.7836  | -0.3614 | 0.5920  | Cl |
| 28 | C128 | 3.1183  | -1.3103 | -1.6436 | Cl |
| 29 | H29  | 1.6454  | 1.9960  | -0.1071 | H  |
| 30 | H30  | 0.3386  | -2.3039 | 0.7352  | H  |
| 31 | H31  | -0.5131 | -3.8776 | 1.2313  | H  |

@<TRIPOS>BOND

1 1 2 1  
 2 1 6 1  
 3 1 21 2  
 4 3 4 1  
 5 3 5 2  
 6 3 25 2  
 7 4 26 1  
 8 4 27 1  
 9 4 28 1  
 10 6 7 Ar  
 11 6 8 1  
 12 7 9 1  
 13 7 22 Ar  
 14 8 10 Ar  
 15 8 11 Ar  
 16 9 19 1  
 17 9 20 2  
 18 10 12 2  
 19 10 17 1  
 20 11 14 Ar  
 21 11 19 1  
 22 12 13 1  
 23 12 15 Ar  
 24 14 15 Ar  
 25 14 18 1  
 26 15 16 1  
 27 21 30 1  
 28 21 31 1  
 29 22 23 1  
 30 22 24 1  
 31 25 29 1

str-[1,5]-H-shift-TS8 optimized structure: transition state

@<TRIPOS>MOLECULE

Molecule Name

31 31

SMALL

NO\_CHARGES

@<TRIPOS>ATOM

|   |    |        |         |         |   |
|---|----|--------|---------|---------|---|
| 1 | C1 | 0.7990 | -0.3467 | -0.5967 | C |
|---|----|--------|---------|---------|---|

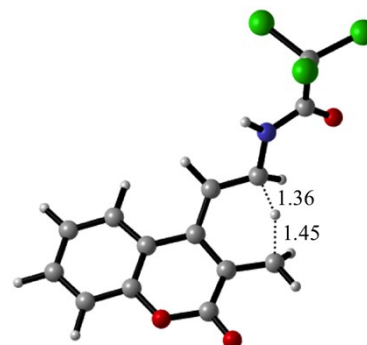

|    |      |         |         |         |    |
|----|------|---------|---------|---------|----|
| 2  | H2   | 0.6351  | -1.3639 | -0.2480 | H  |
| 3  | C3   | -2.7892 | 0.3238  | -0.6574 | C  |
| 4  | C4   | -3.9820 | -0.2387 | 0.2005  | C  |
| 5  | O5   | -2.9884 | 0.9533  | -1.6743 | O  |
| 6  | C6   | 2.0993  | 0.1489  | -0.5300 | C  |
| 7  | C7   | 2.3041  | 1.5534  | -0.4392 | C  |
| 8  | C8   | 3.2474  | -0.7265 | -0.2708 | C  |
| 9  | C9   | 3.4528  | 2.0685  | 0.3332  | C  |
| 10 | C10  | 3.2725  | -2.0992 | -0.5694 | C  |
| 11 | C11  | 4.3990  | -0.1570 | 0.2931  | C  |
| 12 | C12  | 4.3949  | -2.8721 | -0.2953 | C  |
| 13 | H13  | 4.3960  | -3.9297 | -0.5382 | H  |
| 14 | C14  | 5.5328  | -0.9209 | 0.5718  | C  |
| 15 | C15  | 5.5262  | -2.2805 | 0.2789  | C  |
| 16 | H16  | 6.4068  | -2.8789 | 0.4906  | H  |
| 17 | H17  | 2.4085  | -2.5509 | -1.0470 | H  |
| 18 | H18  | 6.3944  | -0.4332 | 1.0141  | H  |
| 19 | O19  | 4.4651  | 1.1751  | 0.6242  | O  |
| 20 | O20  | 3.5834  | 3.2110  | 0.7075  | O  |
| 21 | C21  | -0.3605 | 0.4776  | -0.7864 | C  |
| 22 | H22  | 0.1477  | 1.6755  | -0.3903 | H  |
| 23 | H23  | -0.6019 | 0.8715  | -1.7725 | H  |
| 24 | C24  | 1.2895  | 2.4645  | -0.7969 | C  |
| 25 | H25  | 0.8993  | 2.4432  | -1.8122 | H  |
| 26 | H26  | 1.3669  | 3.4645  | -0.3754 | H  |
| 27 | N27  | -1.5557 | 0.0137  | -0.1659 | N  |
| 28 | C128 | -5.5257 | 0.3519  | -0.4346 | C1 |
| 29 | C129 | -3.9338 | -2.0466 | 0.1231  | C1 |
| 30 | C130 | -3.7920 | 0.2815  | 1.9258  | C1 |
| 31 | H31  | -1.4820 | -0.4546 | 0.7271  | H  |

@<TRIPOS>BOND

1 1 2 1  
2 1 6 Ar  
3 1 21 Ar  
4 3 4 1  
5 3 5 2  
6 3 27 Ar  
7 4 28 1  
8 4 29 1  
9 4 30 1  
10 6 7 Ar  
11 6 8 1  
12 7 9 1  
13 7 24 Ar  
14 8 10 Ar  
15 8 11 Ar  
16 9 19 1  
17 9 20 2  
18 10 12 Ar  
19 10 17 1  
20 11 14 Ar  
21 11 19 1  
22 12 13 1  
23 12 15 Ar

24 14 15 Ar  
25 14 18 1  
26 15 16 1  
27 21 23 1  
28 21 27 1  
29 24 25 1  
30 24 26 1  
31 27 31 1

## References:

1) Rajale, T.; Sharma, S.; Stroud, D.A.; Unruh, D.K.; Miaou, E.; Lai, K.; Birney, D.M.

*Tetrahedron Lett.* **2014**, *55*, 6627-6630.

2) Full Gaussian 09 Reference (reference 27 in main text) Revision D.01, M. J. Frisch, G. W.

Trucks, H. B. Schlegel, G. E. Scuseria, M. A. Robb, J. R. Cheeseman, G. Scalmani, V. Barone,

B. Mennucci, G. A. Petersson, H. Nakatsuji, M. Caricato, X. Li, H. P. Hratchian, A. F. Izmaylov,

J. Bloino, G. Zheng, J. L. Sonnenberg, M. Hada, M. Ehara, K. Toyota, R. Fukuda, J. Hasegawa,

M. Ishida, T. Nakajima, Y. Honda, O. Kitao, H. Nakai, T. Vreven, J. A. Montgomery, Jr., J. E.

Peralta, F. Ogliaro, M. Bearpark, J. J. Heyd, E. Brothers, K. N. Kudin, V. N. Staroverov, T.

Keith, R. Kobayashi, J. Normand, K. Raghavachari, A. Rendell, J. C. Burant, S. S. Iyengar, J.

Tomasi, M. Cossi, N. Rega, J. M. Millam, M. Klene, J. E. Knox, J. B. Cross, V. Bakken, C.

Adamo, J. Jaramillo, R. Gomperts, R. E. Stratmann, O. Yazyev, A. J. Austin, R. Cammi, C.

Pomelli, J. W. Ochterski, R. L. Martin, K. Morokuma, V. G. Zakrzewski, G. A. Voth, P.

Salvador, J. J. Dannenberg, S. Dapprich, A. D. Daniels, O. Farkas, J. B. Foresman, J. V. Ortiz, J.

Cioslowski, and D. J. Fox, Gaussian, Inc., Wallingford CT, 2013.
